# Supplementary material for: Simultaneous quantification of 17 bioactive constituents in Sarcandra glabra by liquid chromatography-electrospray ionisation-mass spectrometry
Source: Royal Society of Chemistry journal article supplement (doi:10.1039/c4ay01259c), 2014-01-01

## Supporting Information

### 1. The $^1\text{H}$ -NMR, $^{13}\text{C}$ -NMR, DEPT, MS and MS/MS spectral data of the isolated ingredients (1-4, 6-15 and 17) from *Sarcandra glabra*

#### 1.1 Spectral data of Protocatechuic acid (1)

$^1\text{H}$ -NMR (500MHz,  $\text{DMSO-}d_6$ ) data of Protocatechuic acid (1)

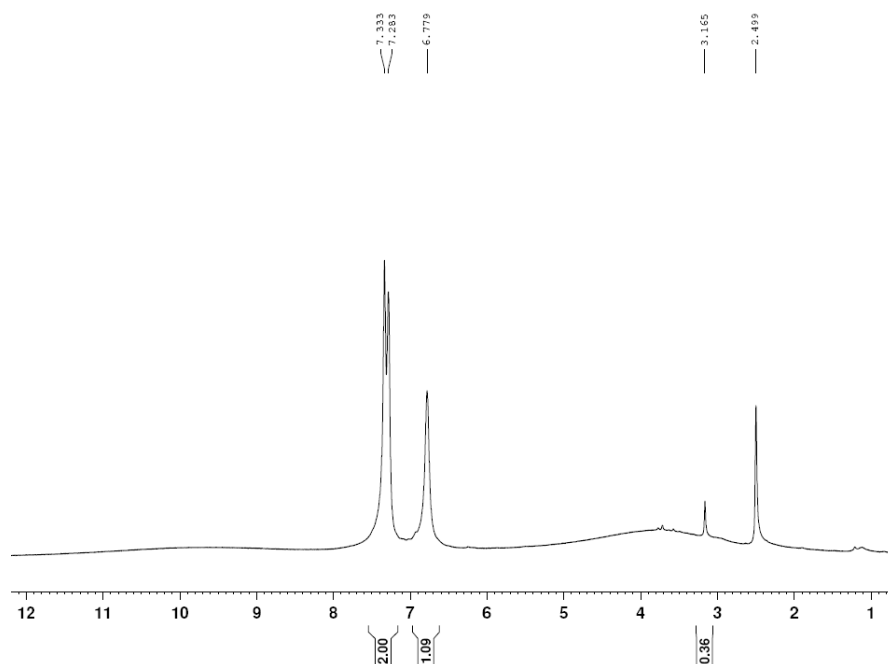

$^{13}\text{C}$ -NMR (125MHz,  $\text{DMSO-}d_6$ ) data of Protocatechuic acid (1)

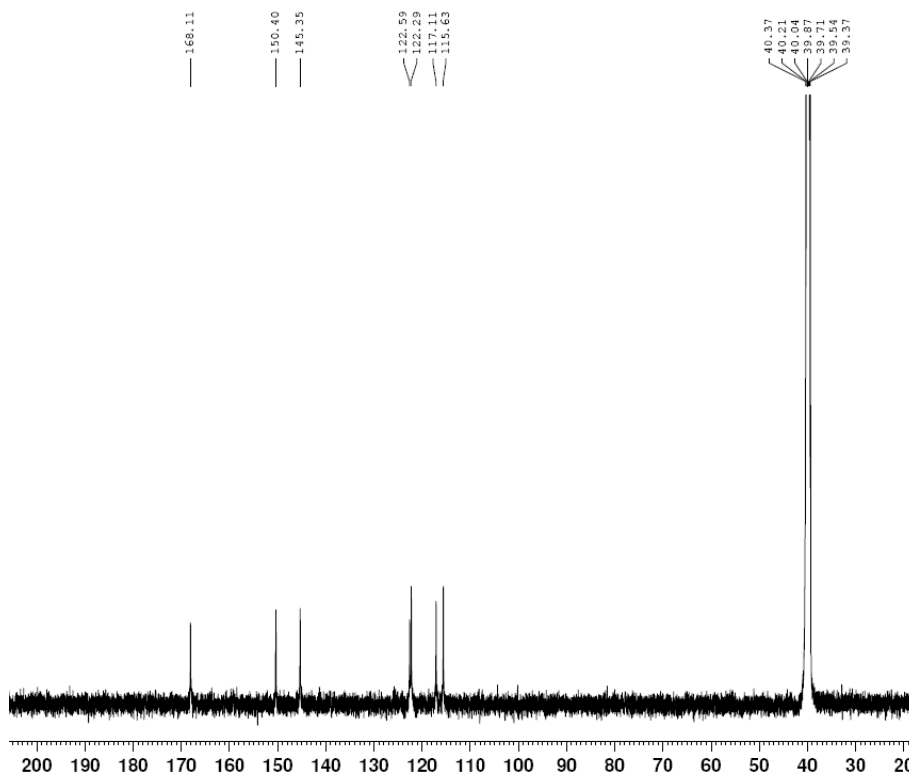

# HR-ESI-MS spectrum of Protocatechuic acid (1)

F: FTMS - p ESI Full ms [100.00-1000.00]

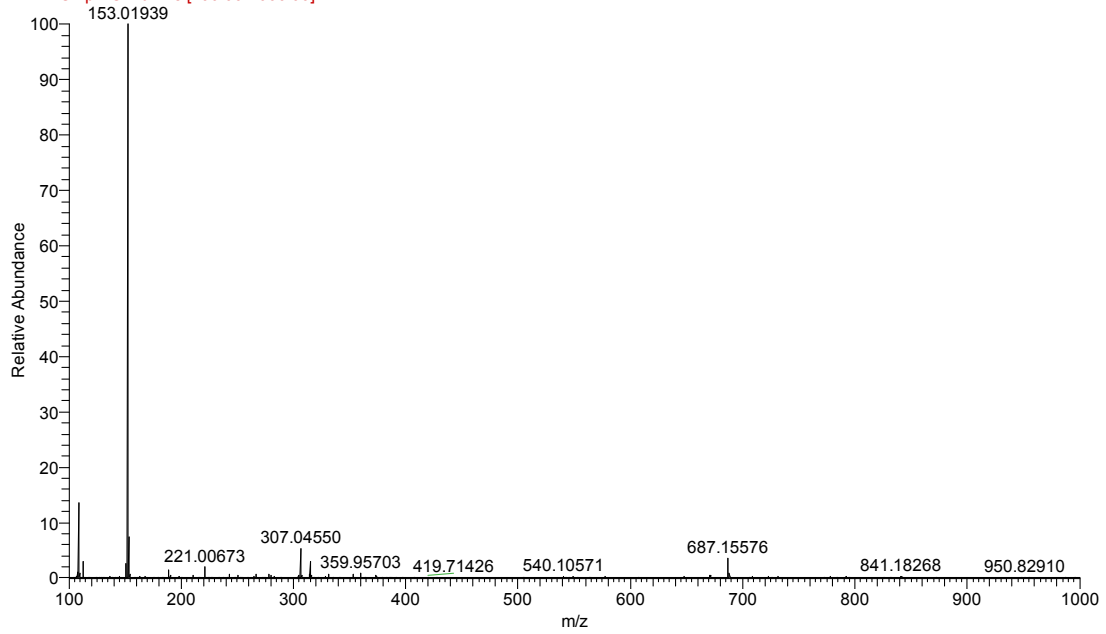

# HR-ESI-MS/MS spectrum of Protocatechuic acid (1)

F: FTMS - p ESI d Full ms2 153.02@cid35.00 [50.00-165.00]

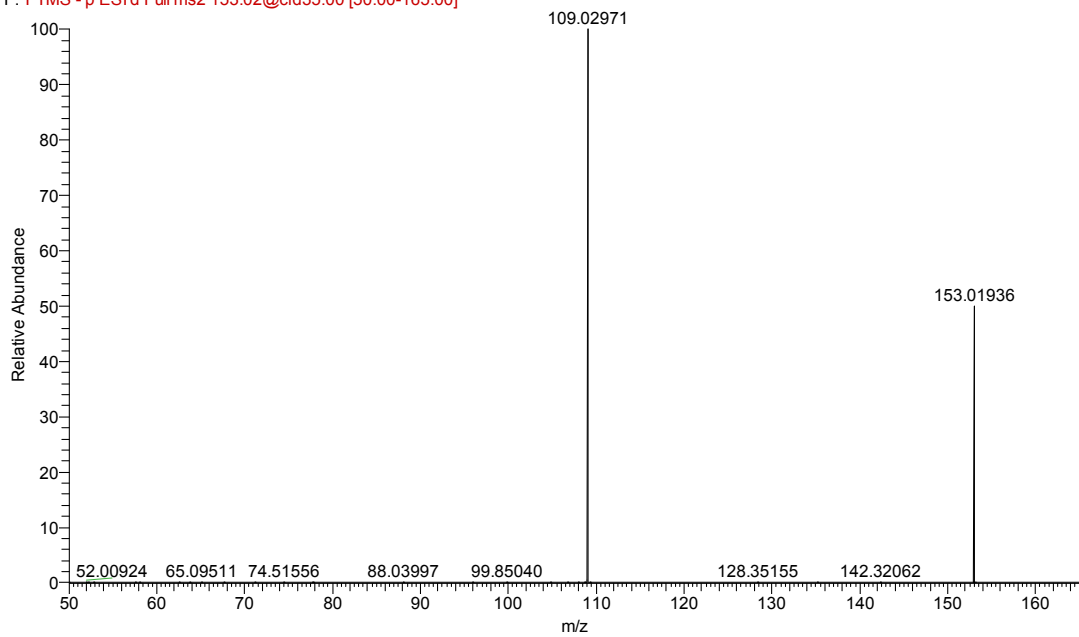

## 1.2 Spectral data of neochlorogenic acid (2)

$^1\text{H-NMR}$  (500MHz,  $\text{DMSO-}d_6$ ) data of neochlorogenic acid (2)

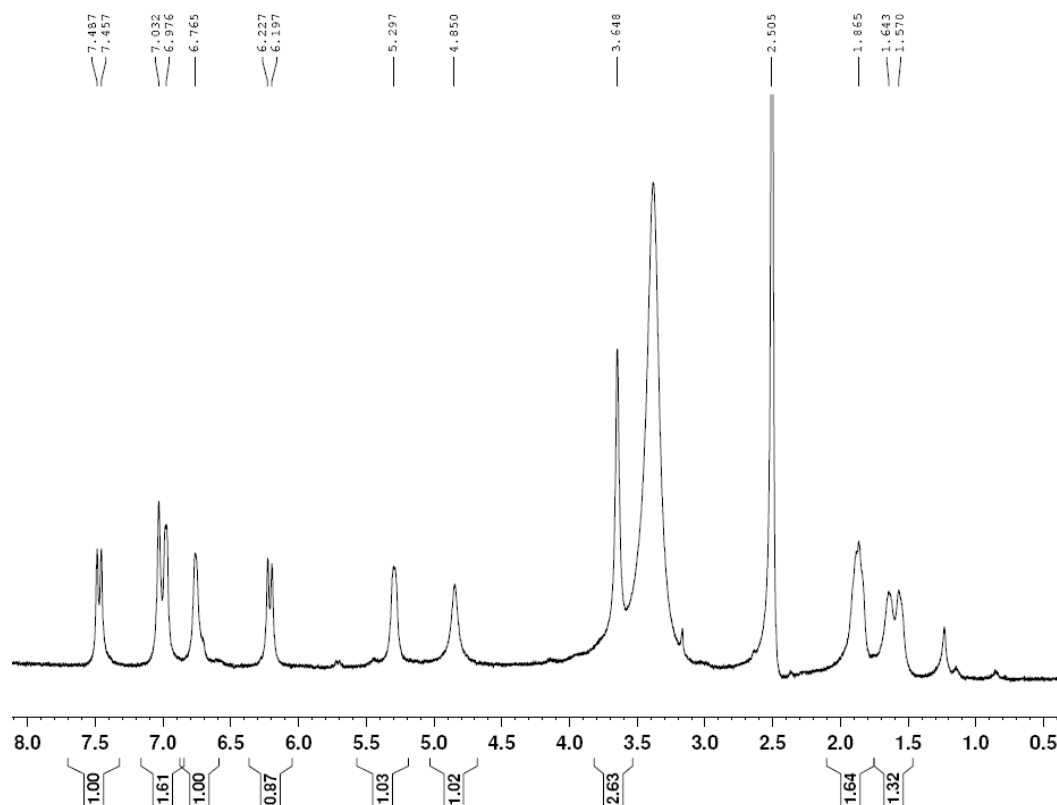

## HR-ESI-MS spectrum of neochlorogenic acid (2)

F: FTMS - p ESI Full ms [100.00-1000.00]

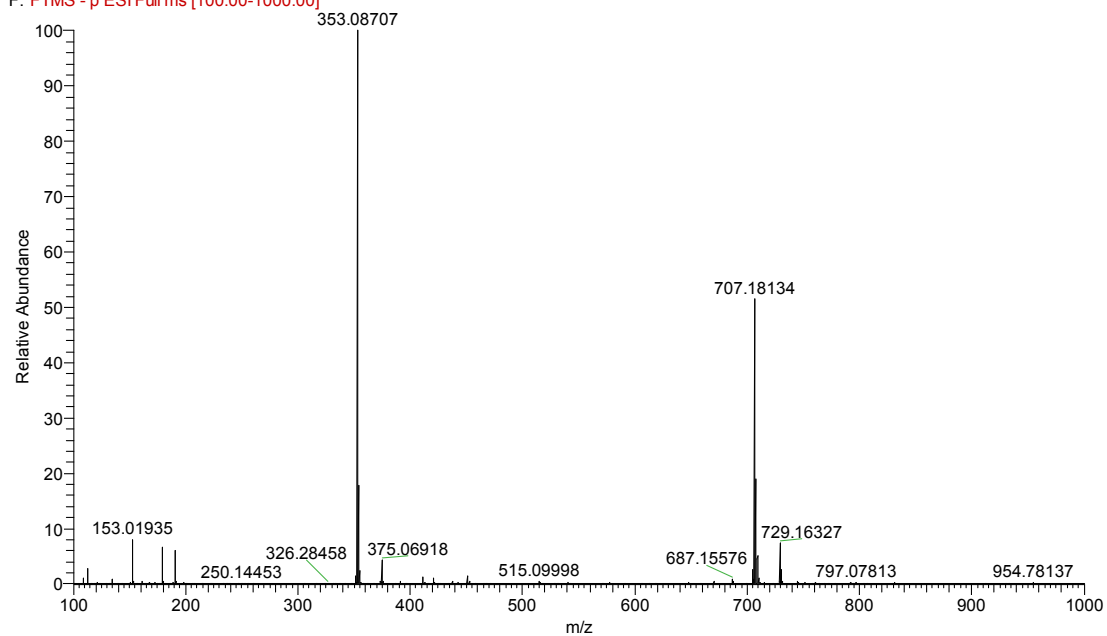

## HR-ESI-MS/MS spectrum of neochlorogenic acid (2)

F: FTMS - p ESI d Full ms2 353.03@cid35.00 [85.00-365.00]

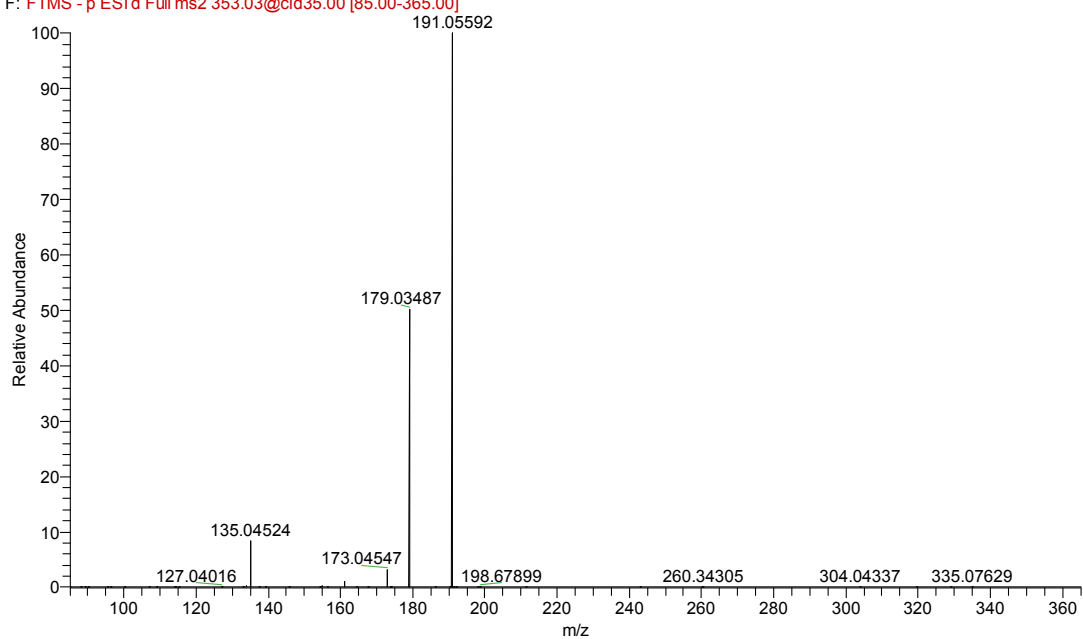

### 1.3 Spectral data of eleutheroside B<sub>1</sub> (3)

<sup>1</sup>H-NMR (500MHz, DMSO-*d*<sub>6</sub>) data of eleutheroside B<sub>1</sub> (3)

c-buoh-23

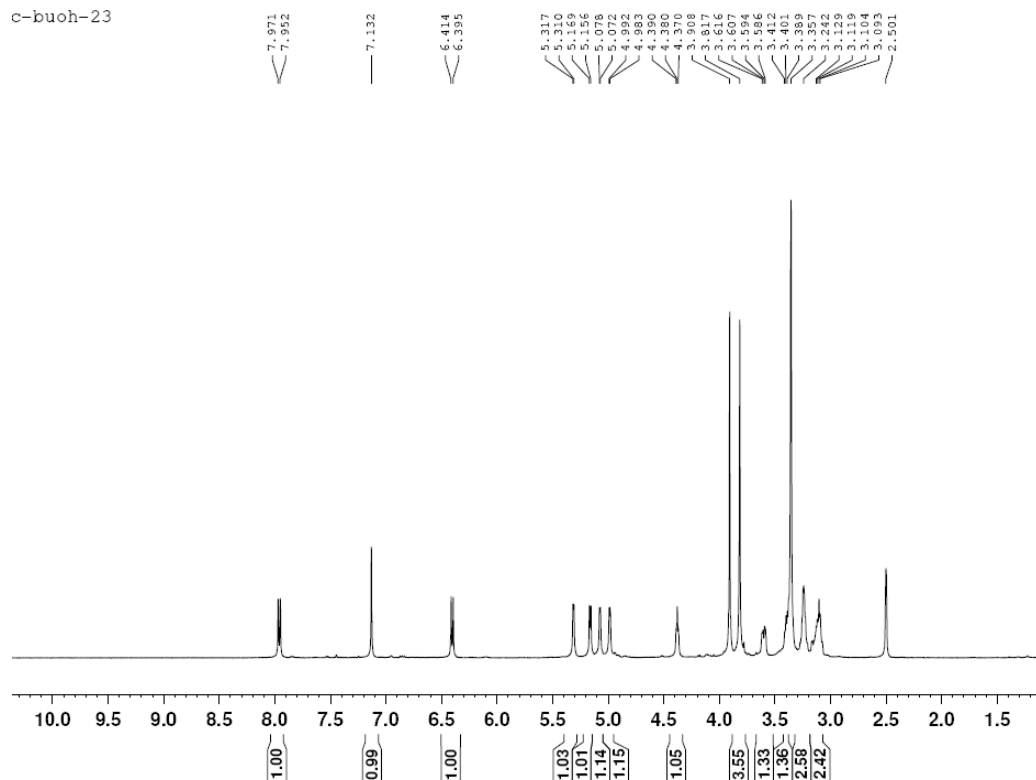

### $^{13}\text{C}$ -NMR (125MHz, DMSO- $d_6$ ) data of eleuthe roside B<sub>1</sub> (3)

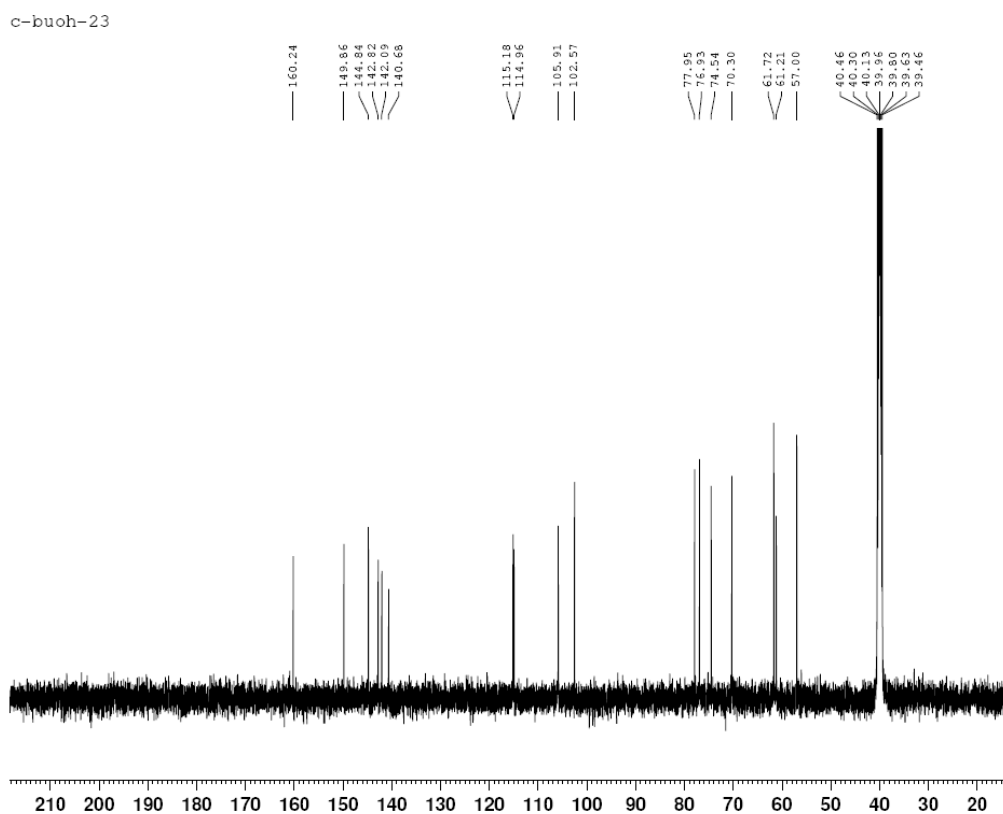

### HR-ESI-MS spectrum of eleuthe roside B<sub>1</sub> (3)

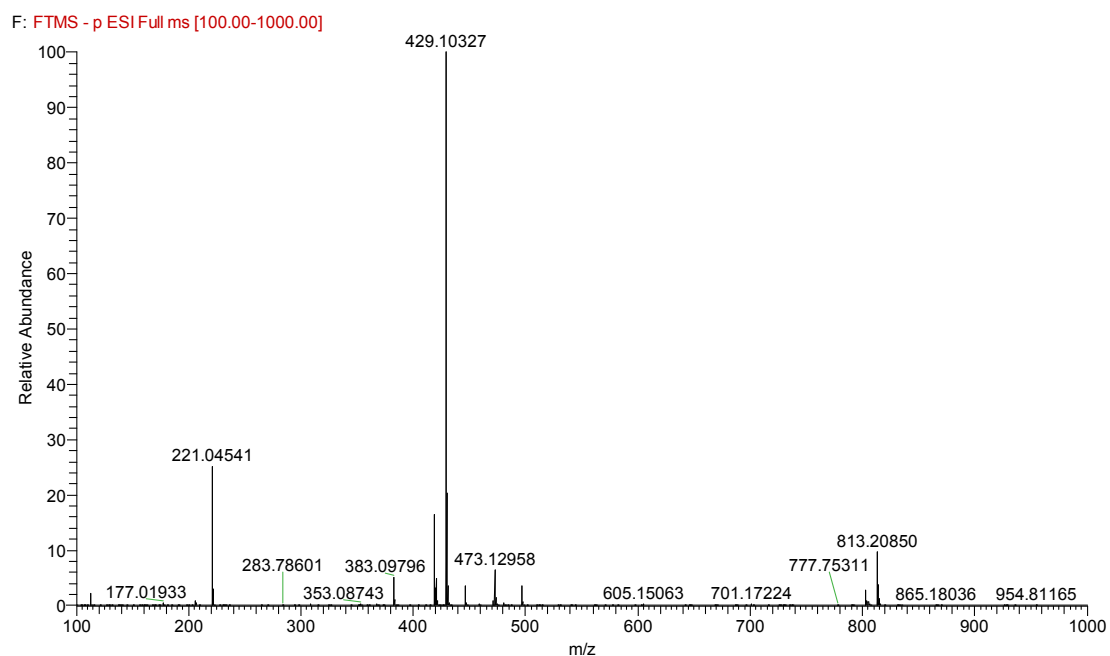

## HR-ESI-MS/MS spectrum of eleutheroid B<sub>1</sub> (3)

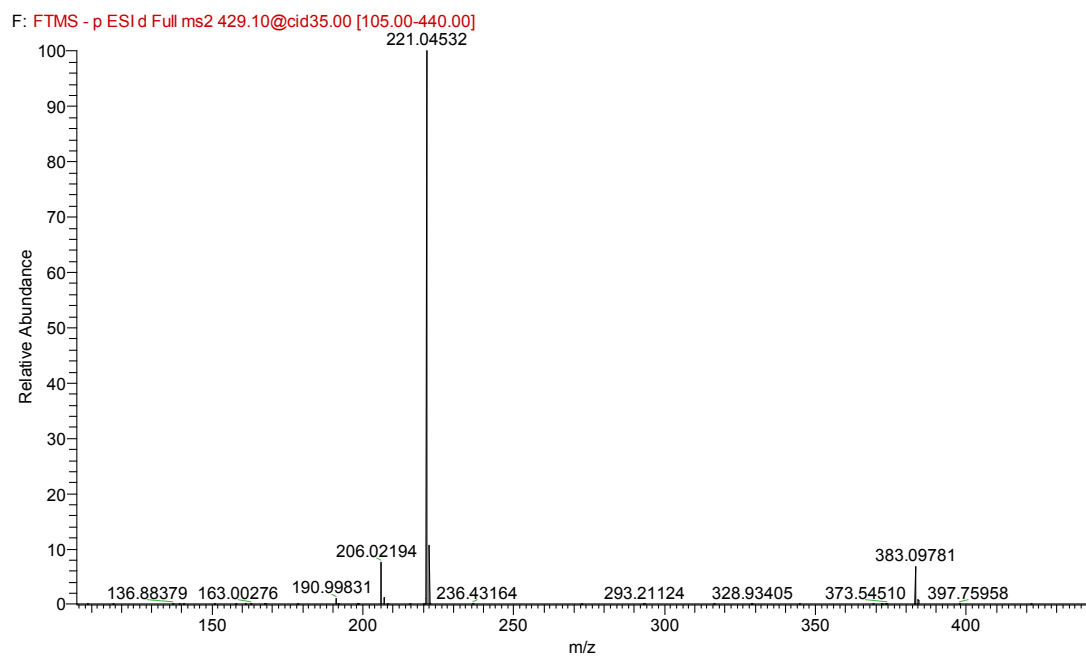

### 1.4 Spectral data of chlorogenic acid (4)

<sup>1</sup>H-NMR (500MHz, DMSO-*d*<sub>6</sub>) data of chlorogenic acid (4)

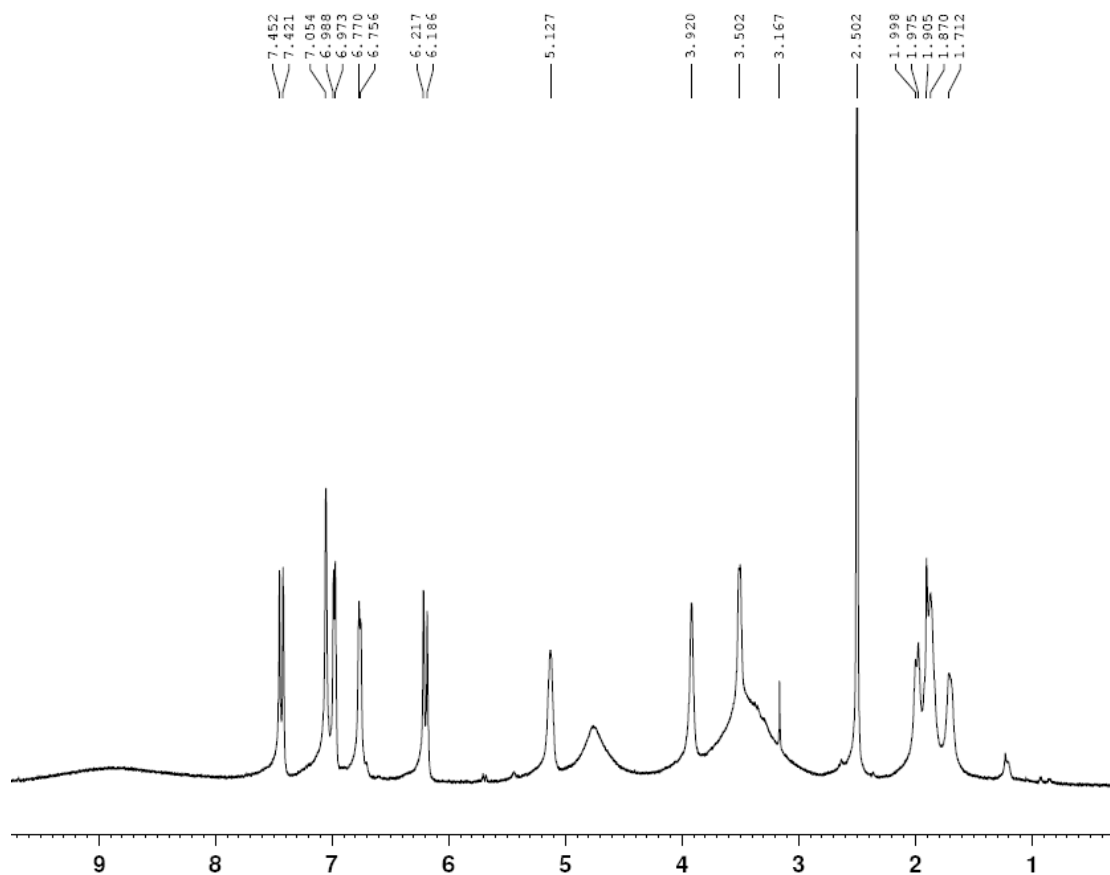

### HR-ESI-MS spectrum of chlorogenic acid (4)

F: FTMS - p ESI Full ms [100.00-1000.00]

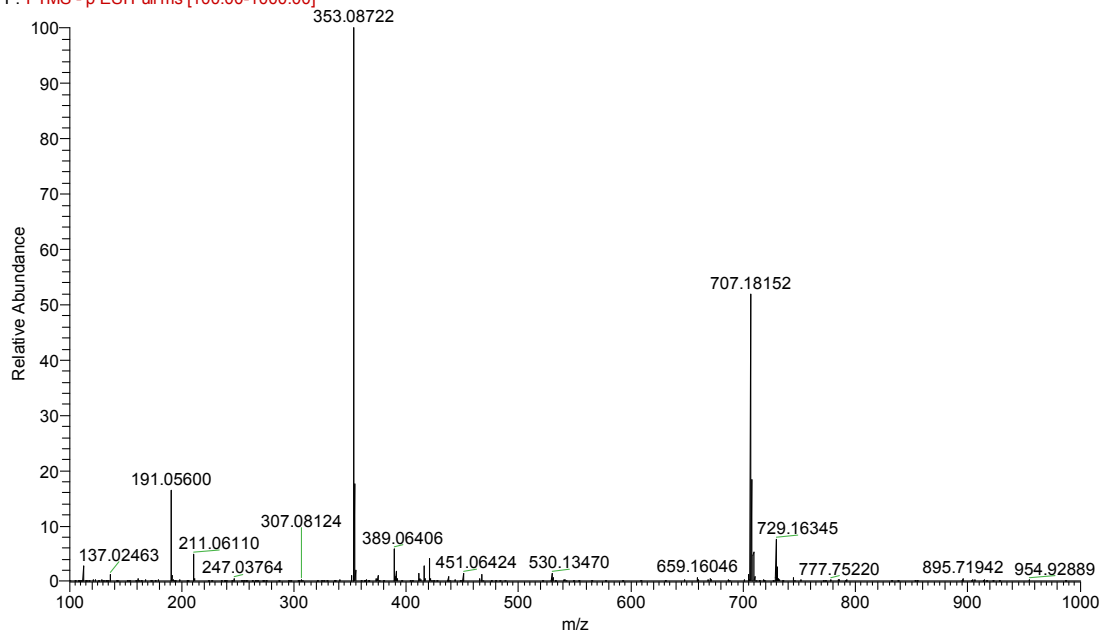

### HR-ESI-MS/MS spectrum of chlorogenic acid (4)

F: FTMS - p ESI d Full ms2 353.03@cid35.00 [85.00-365.00]

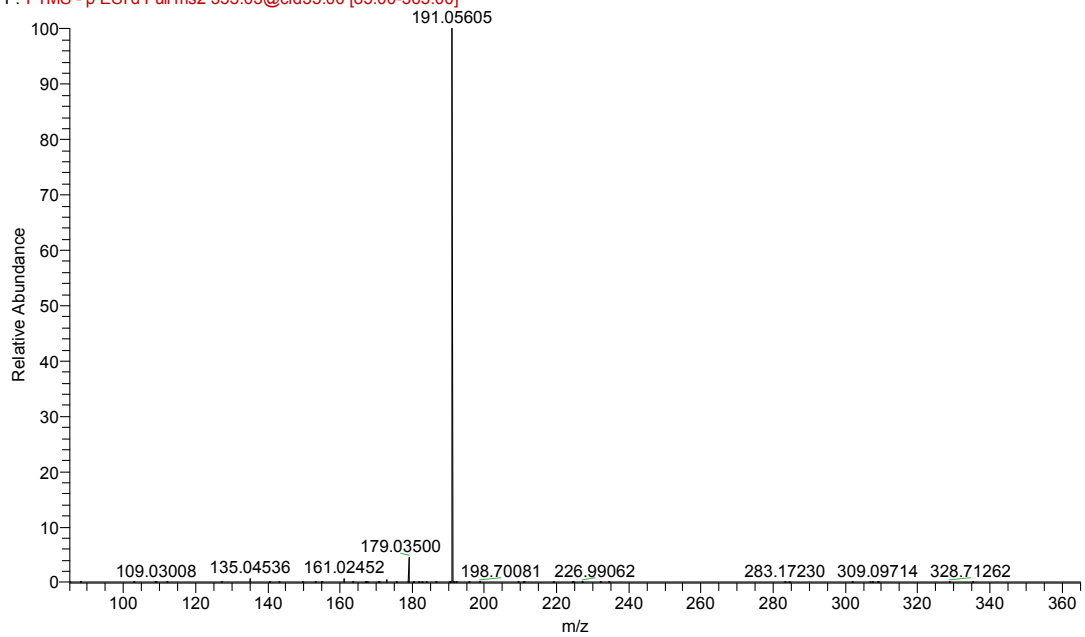

## 1.5 Spectral data of cryptochlorogenic acid (6)

$^1\text{H-NMR}$  (500MHz,  $\text{DMSO-}d_6$ ) data of cryptochlorogenic acid (6)

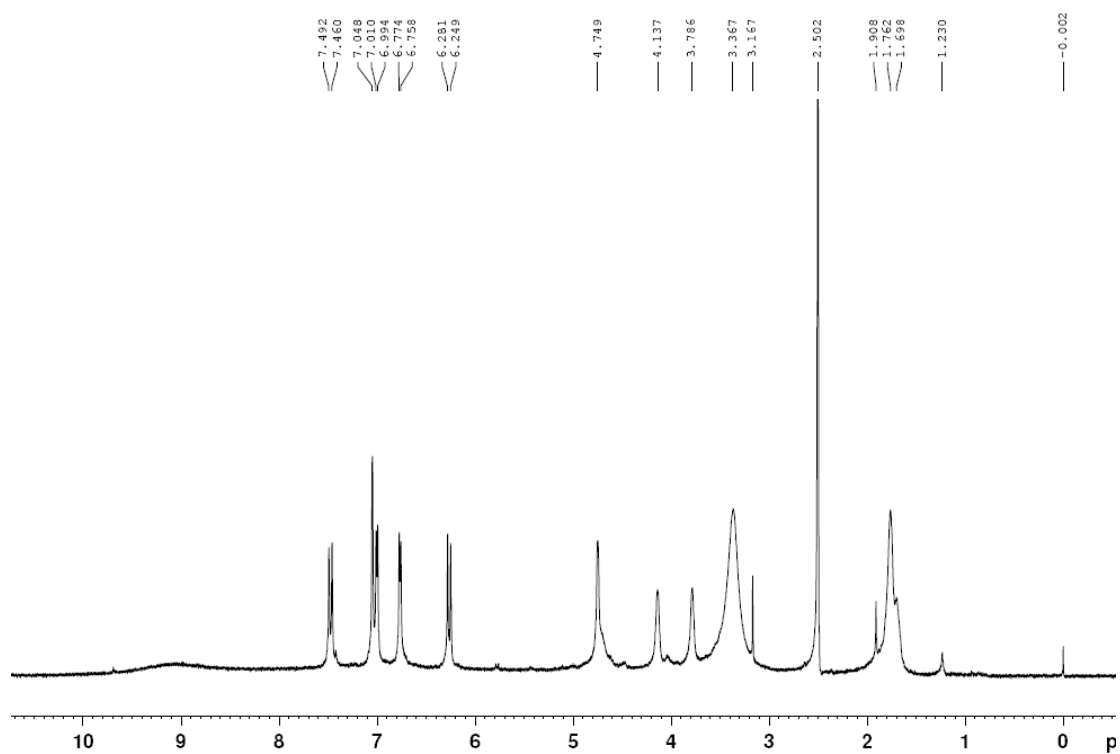

HR-ESI-MS spectrum of cryptochlorogenic acid (6)

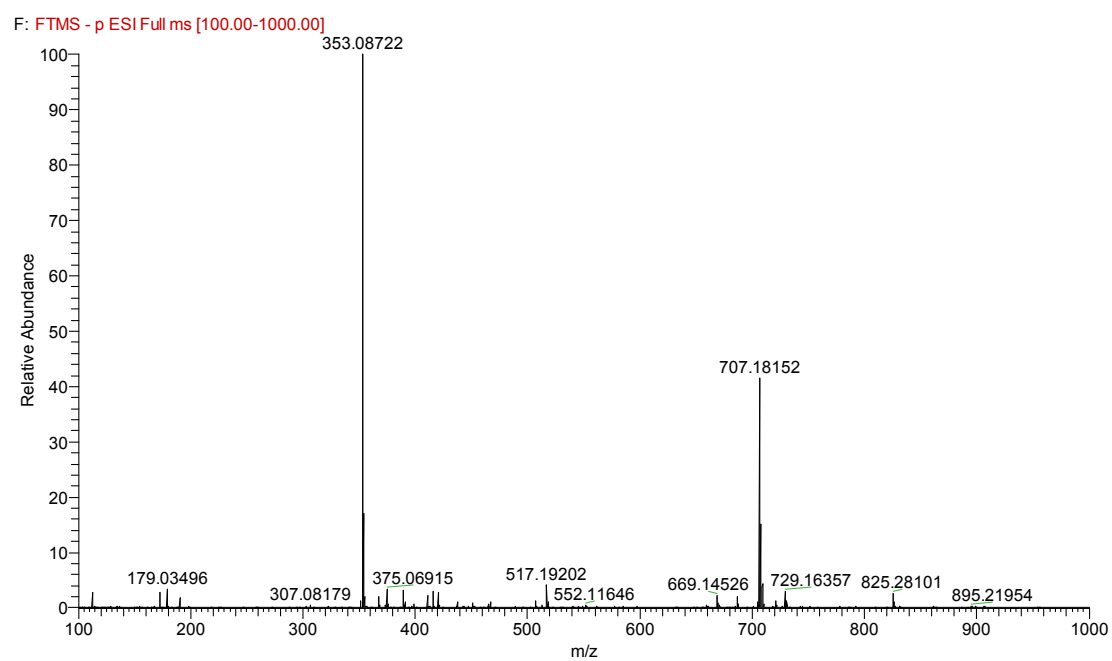

HR-ESI-MS/MS spectrum of cryptochlorogenic acid (6)



F: FTMS - p ESI d Full ms2 353.03@cid35.00 [85.00-365.00]

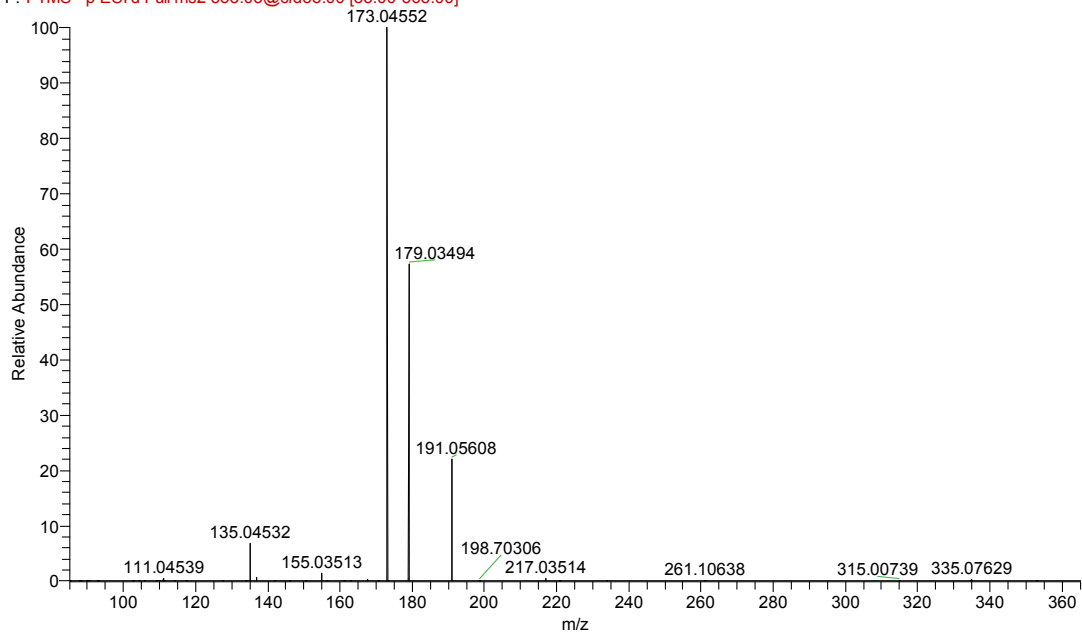

## 1.6 Spectral data of caffeic acid (7)

### <sup>1</sup>H-NMR (500MHz, DMSO-*d*<sub>6</sub>) data of caffeic acid (7)

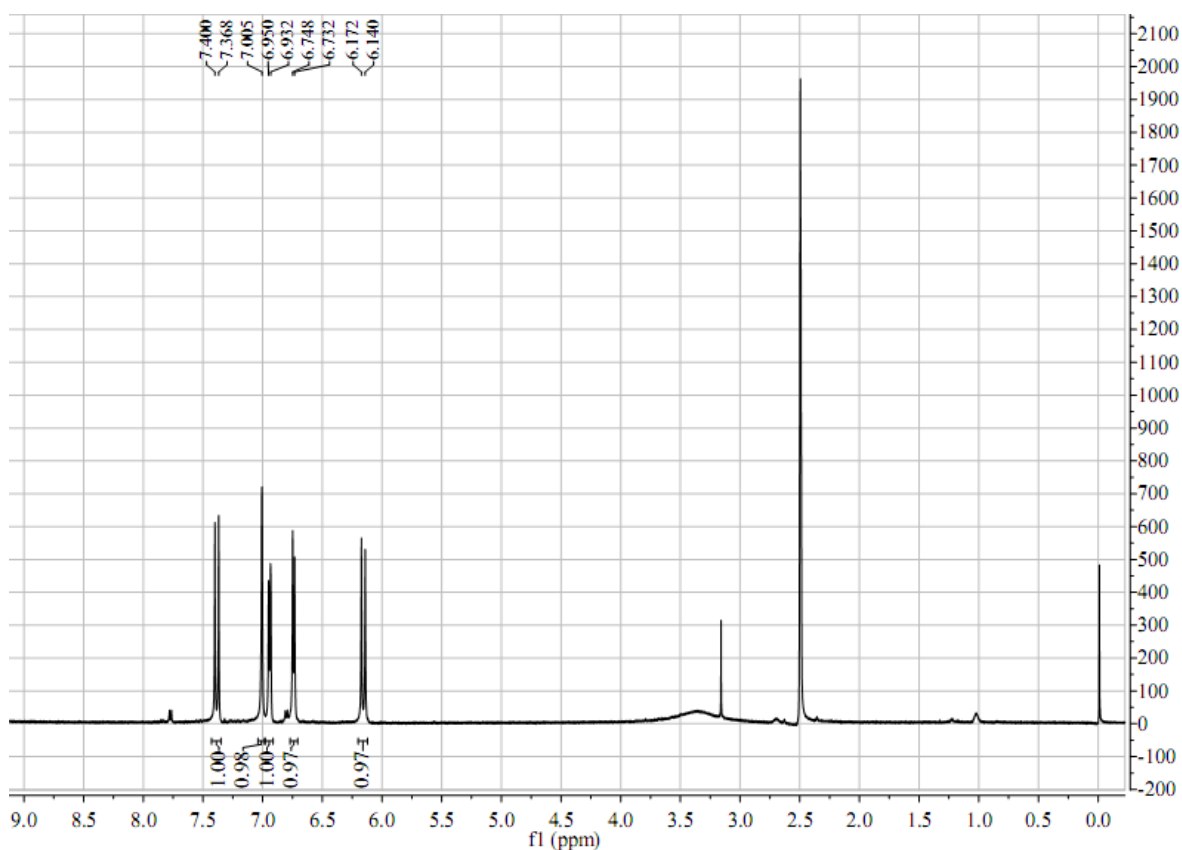

## HR-ESI-MS spectrum of caffeic acid (7)

F: FTMS - p ESI Full ms [100.00-1000.00]

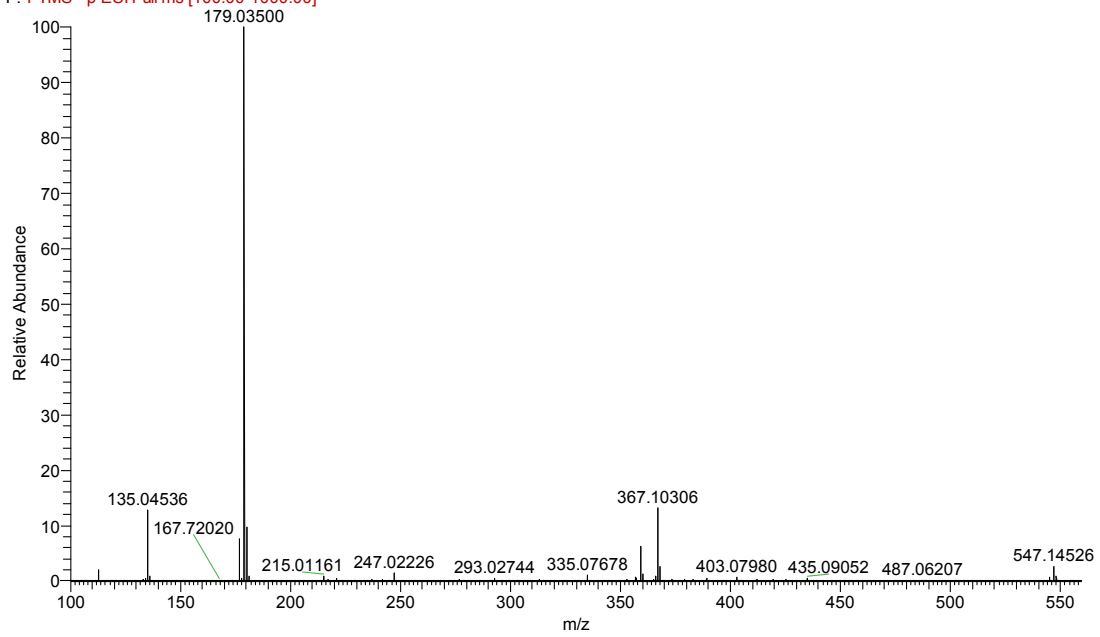

## HR-ESI-MS/MS spectrum of caffeic acid (7)

F: FTMS - p ESI d Full ms2 179.03@cid35.00 [50.00-190.00]

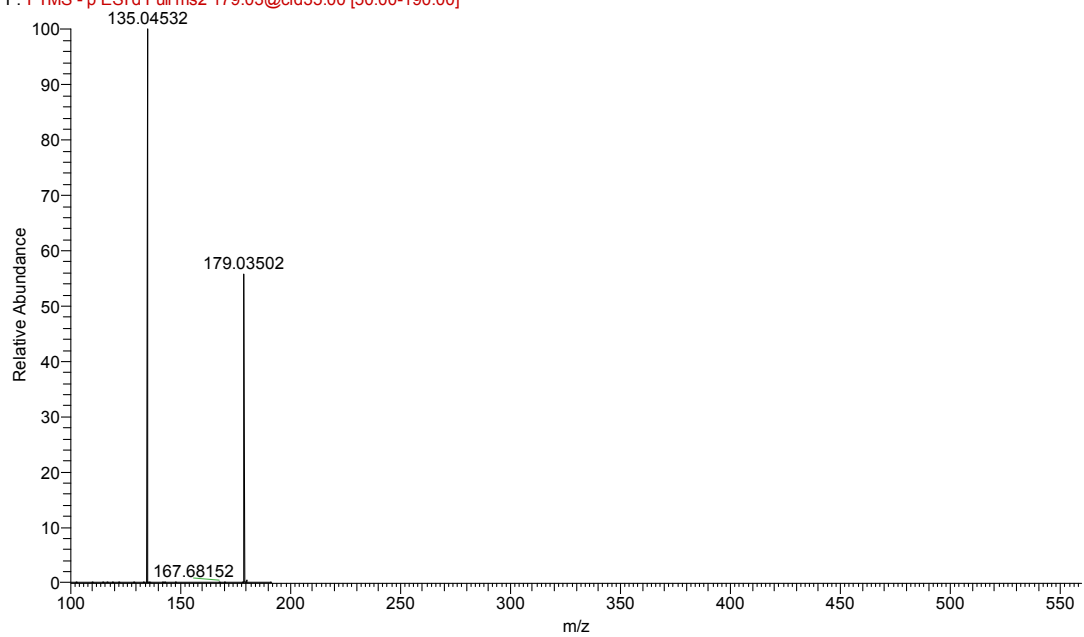

### 1.7 Spectral data of isofraxidin (**8**)

$^1\text{H-NMR}$  (500MHz,  $\text{DMSO-}d_6$ ) data of isofraxidin (**8**)

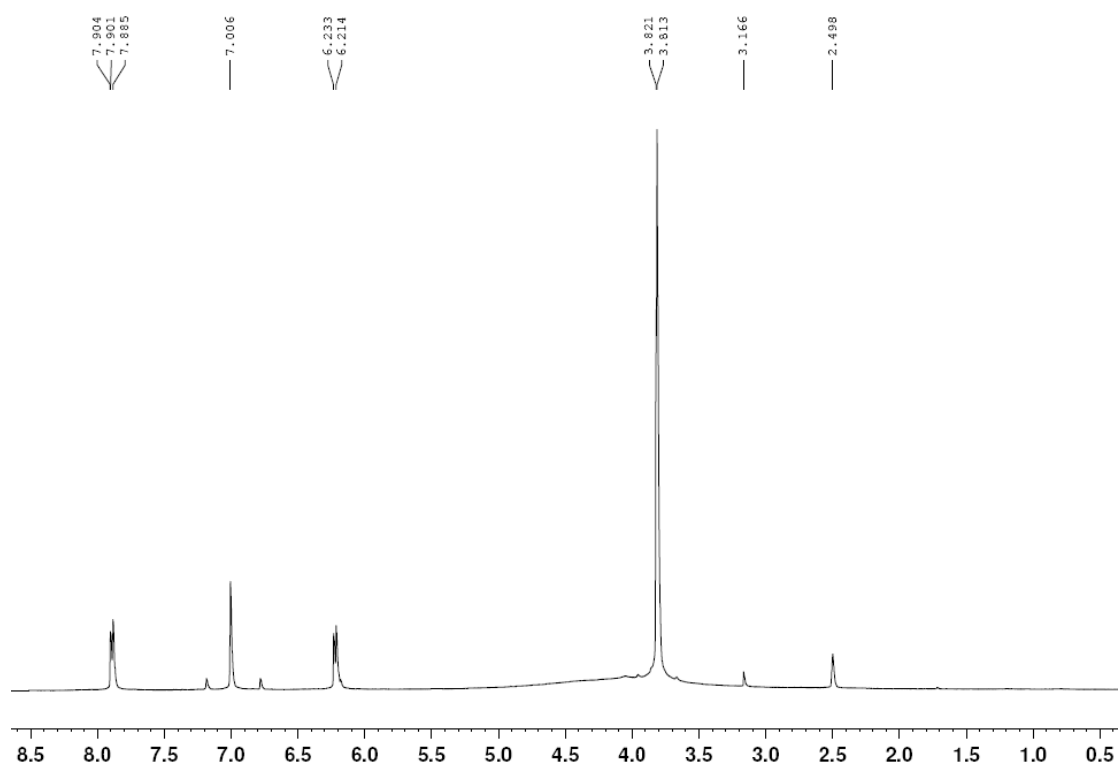

$^{13}\text{C-NMR}$  (125MHz,  $\text{DMSO-}d_6$ ) data of isofraxidin (**8**)

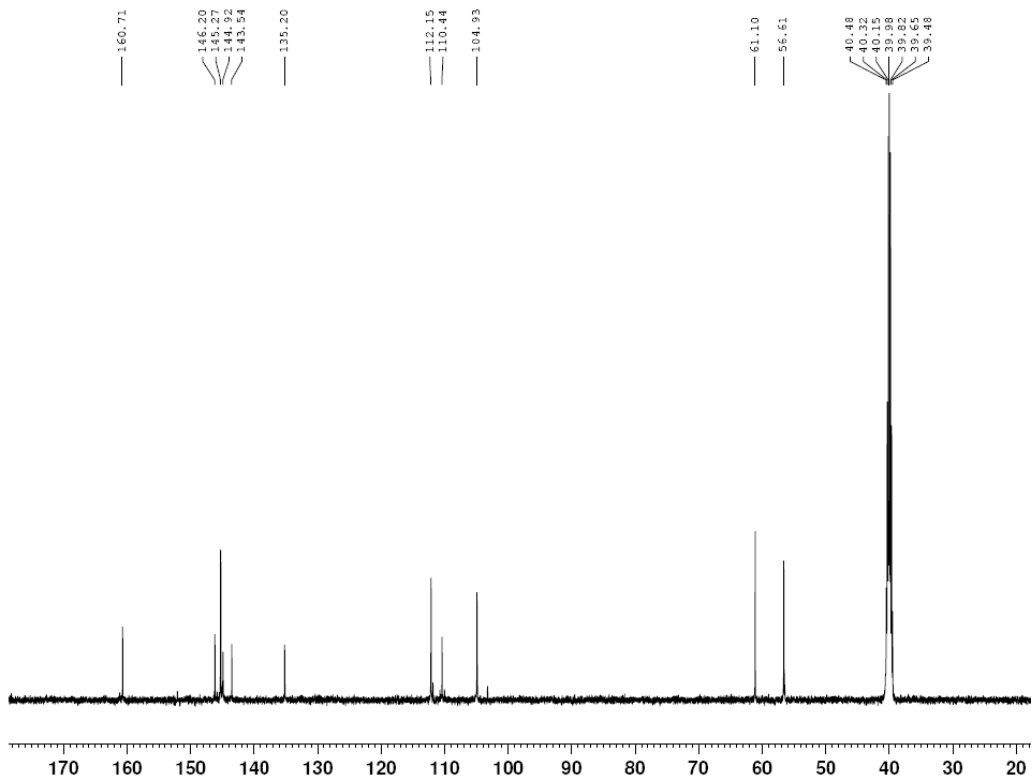

HR-ESI-MS spectrum of isofraxidin (8)

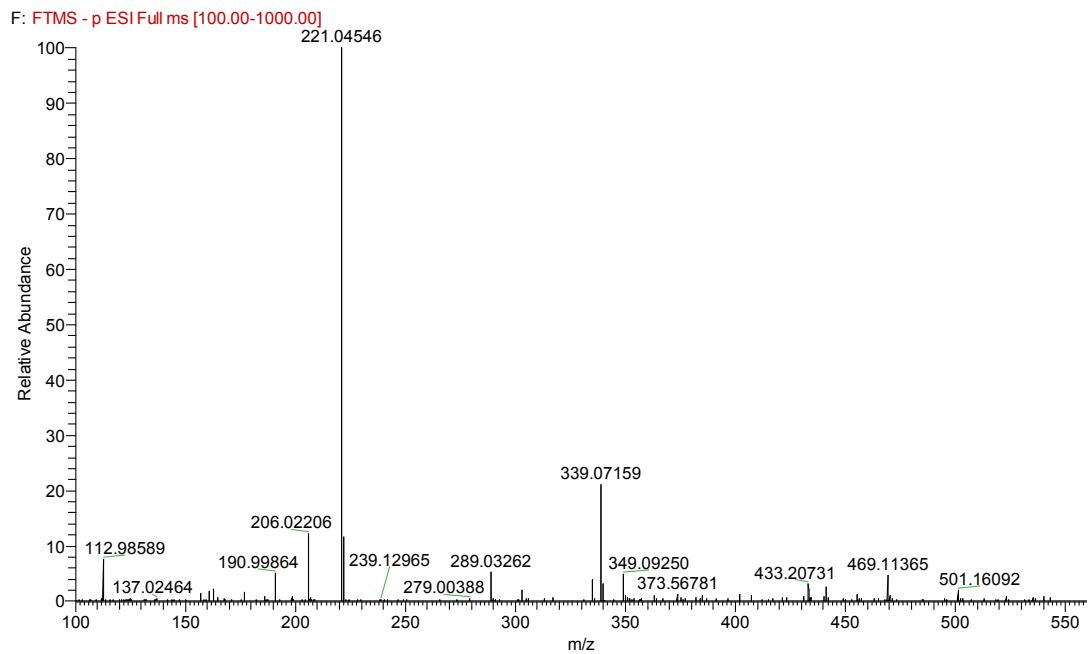

HR-ESI-MS/MS spectrum of isofraxidin (8)

F: FTMS - p ESI d Full ms2 221.05@cid35.00 [50.00-235.00]

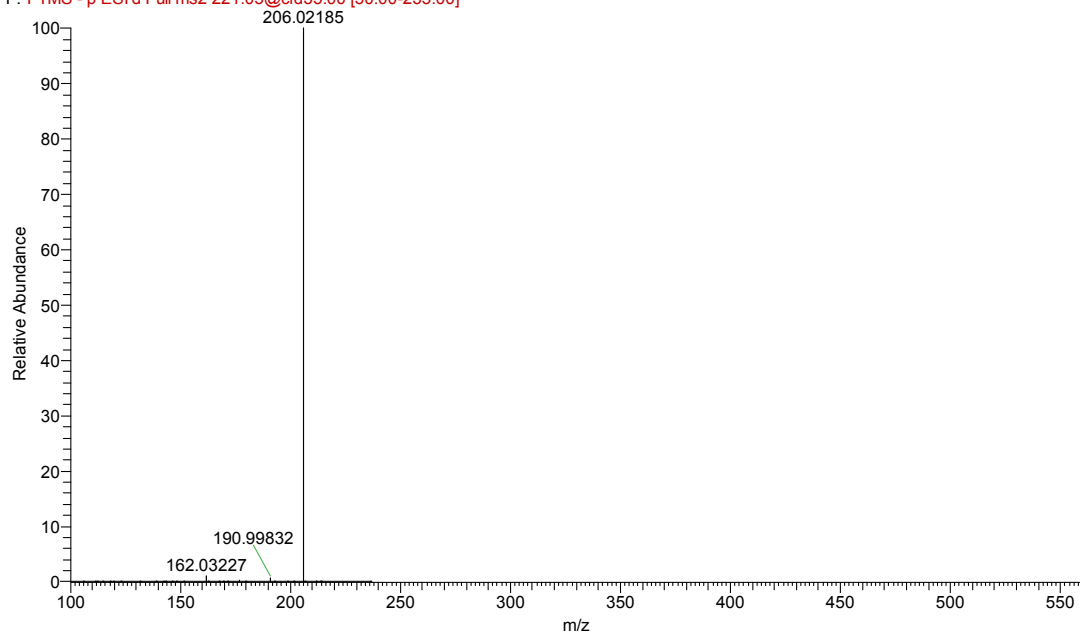

### 1.8 Spectral data of neoastilbin (9)

$^1\text{H-NMR}$  (500MHz,  $\text{DMSO-}d_6$ ) data of neoastilbin (9)

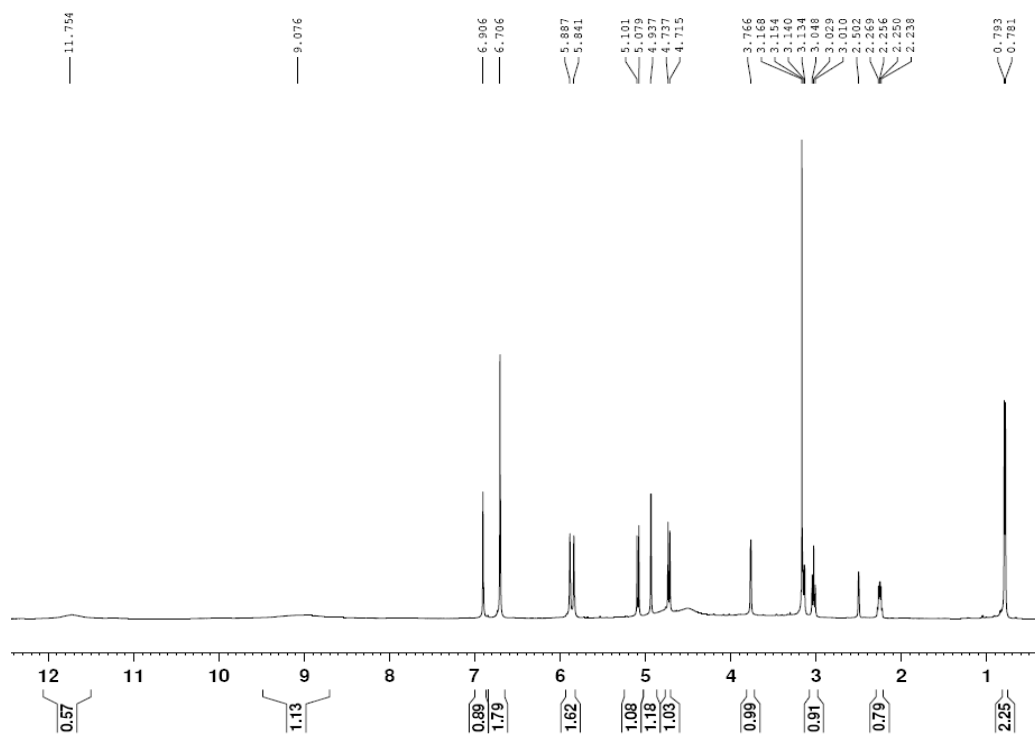

$^{13}\text{C-NMR}$  (125MHz,  $\text{DMSO-}d_6$ ) data of neoastilbin (9)

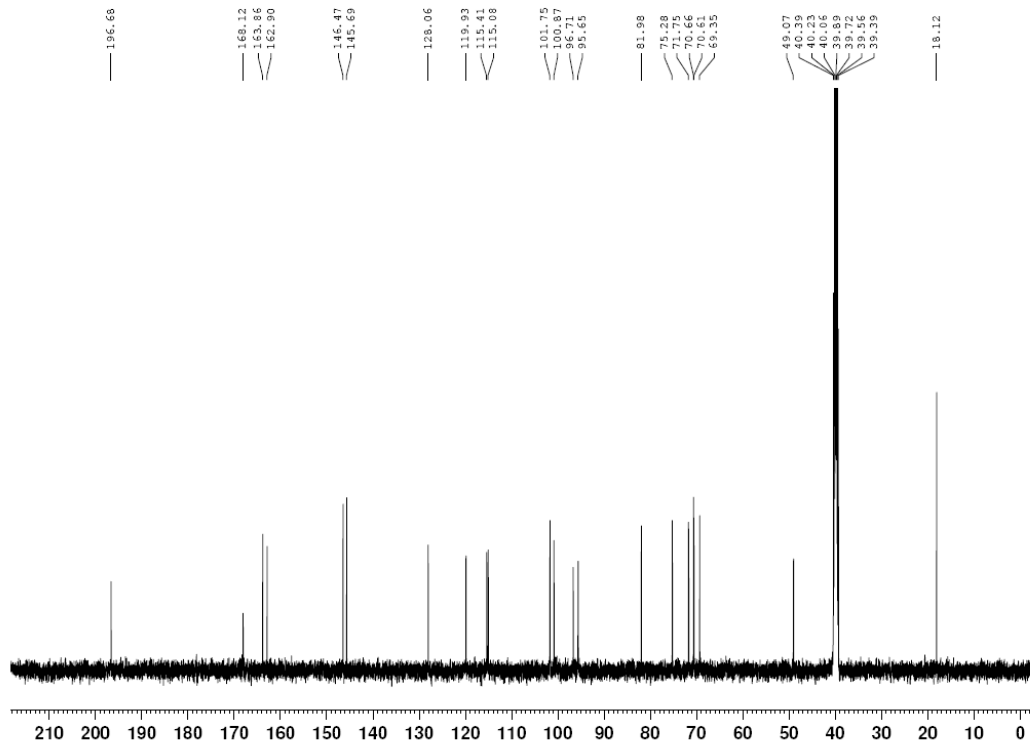

### HR-ESI-MS spectrum of neoastilbin (9)

F: FTMS - p ESI Full ms [100.00-1000.00]

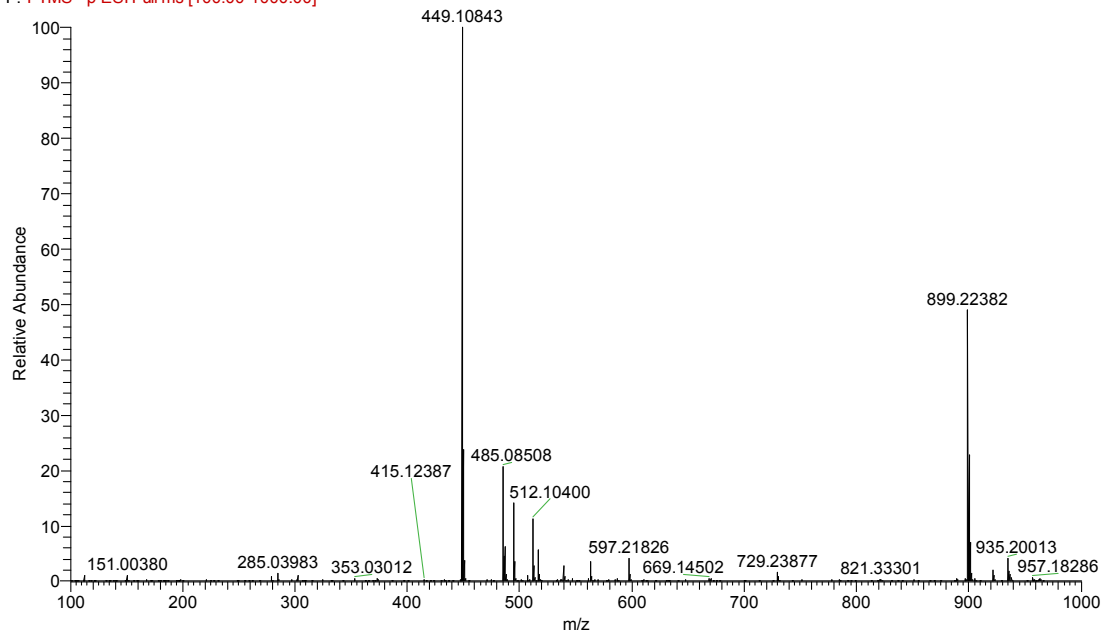

### HR-ESI-MS/MS spectrum of neoastilbin (9)

F: FTMS - p ESI d Full ms2 449.11@cid35.00 [110.00-460.00]

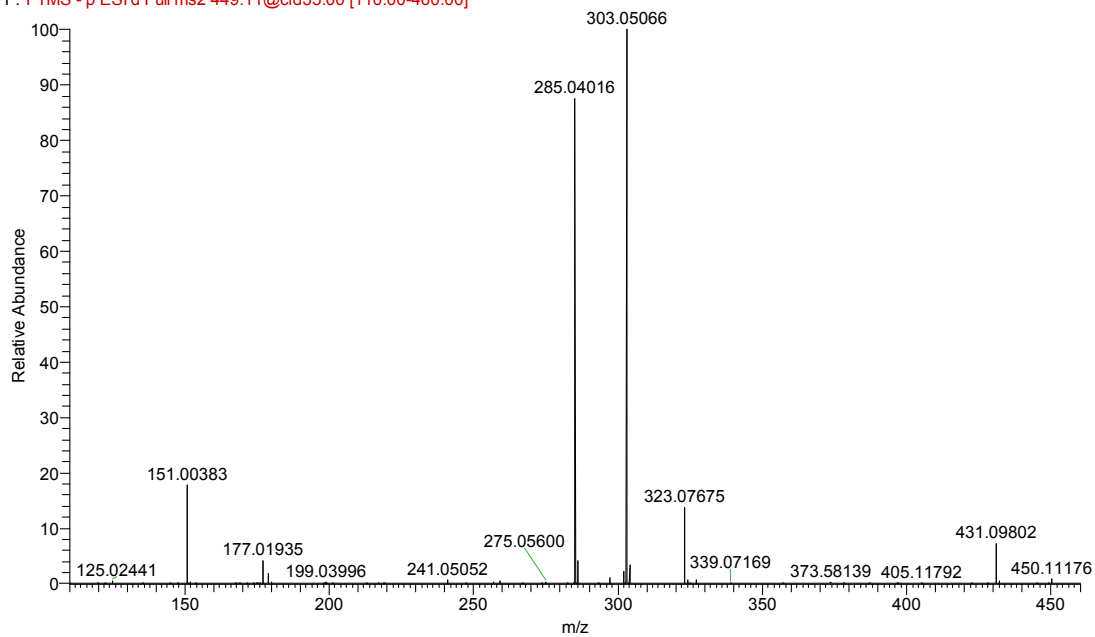

### 1.9 Spectral data of astilbin (10)

<sup>1</sup>H-NMR (500MHz, DMSO-d<sub>6</sub>) data of astilbin (10)

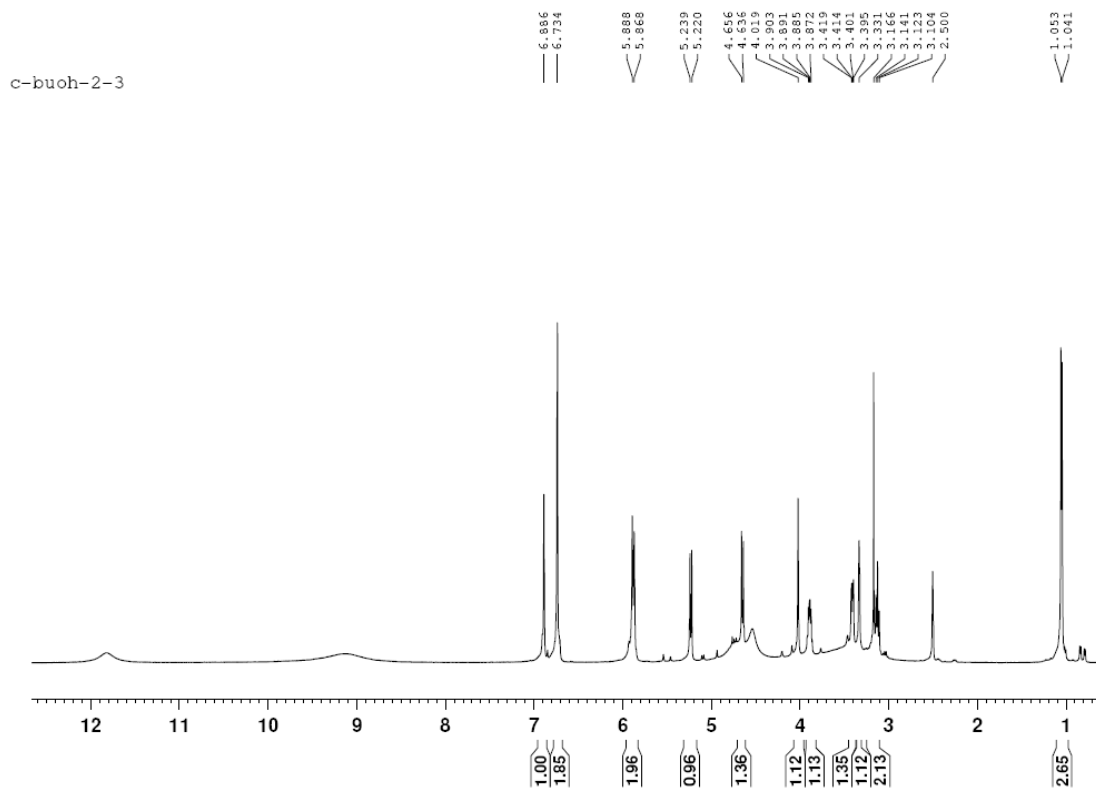

### $^{13}\text{C}$ -NMR (125MHz, DMSO- $d_6$ ) data of astilbin (10)

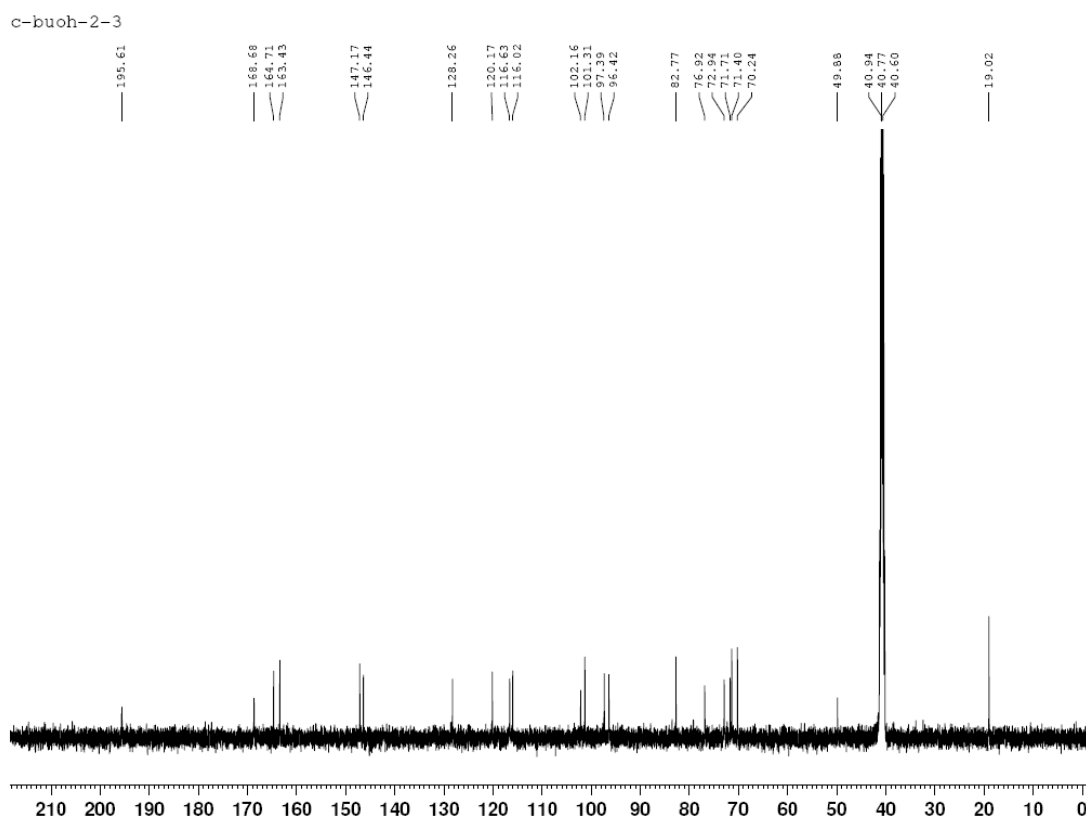

### HR-ESI-MS spectrum of astilbin (10)

F: FTMS - p ESI Full ms [100.00-1000.00]

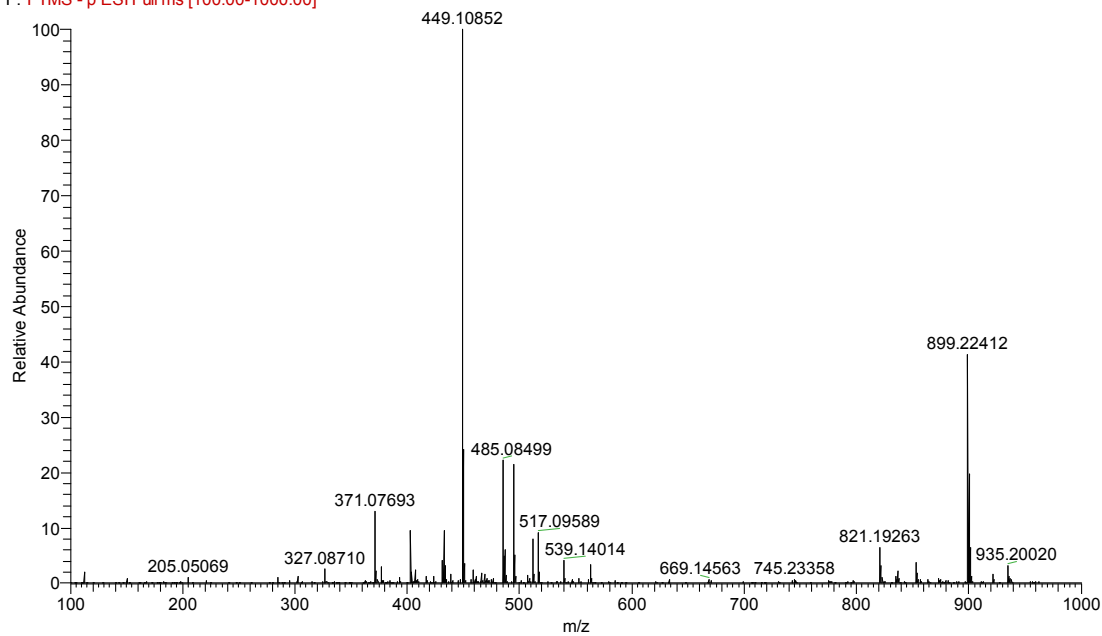

### HR-ESI-MS/MS spectrum of astilbin (10)



F: FTMS - p ESI d Full ms2 449.11@cid35.00 [110.00-460.00]

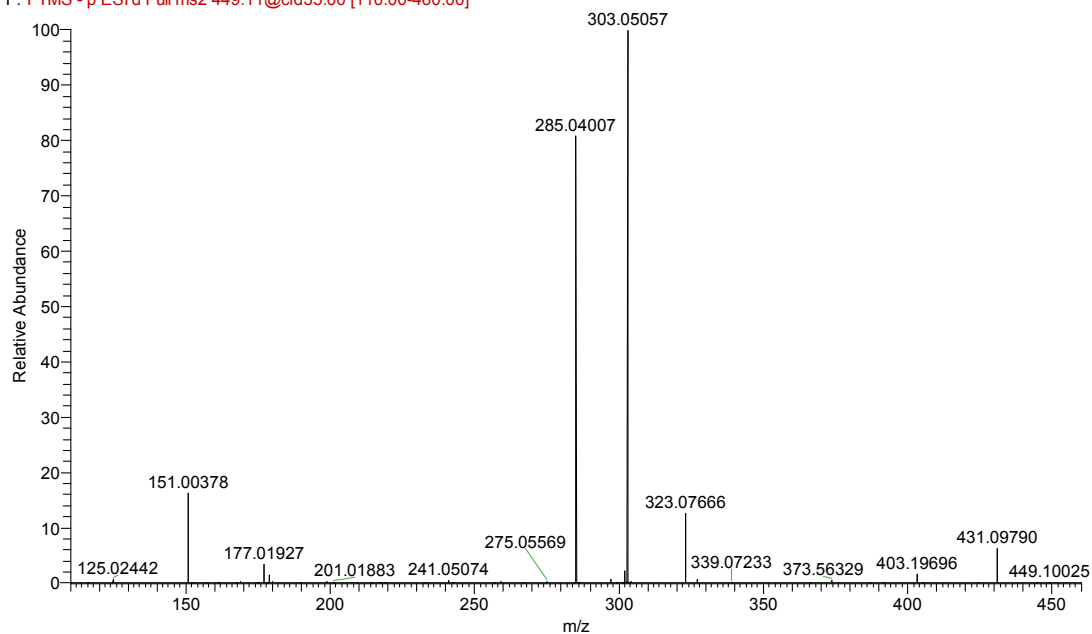

### 1.10 Spectral data of rosmarinic acid 4-*O*-*B*-*D*-glucopyrannoside (**11**)

<sup>1</sup>H-NMR (300MHz, CD<sub>3</sub>OD) data of rosmarinic acid 4-*O*-*B*-*D*-glucopyrannoside (**11**)

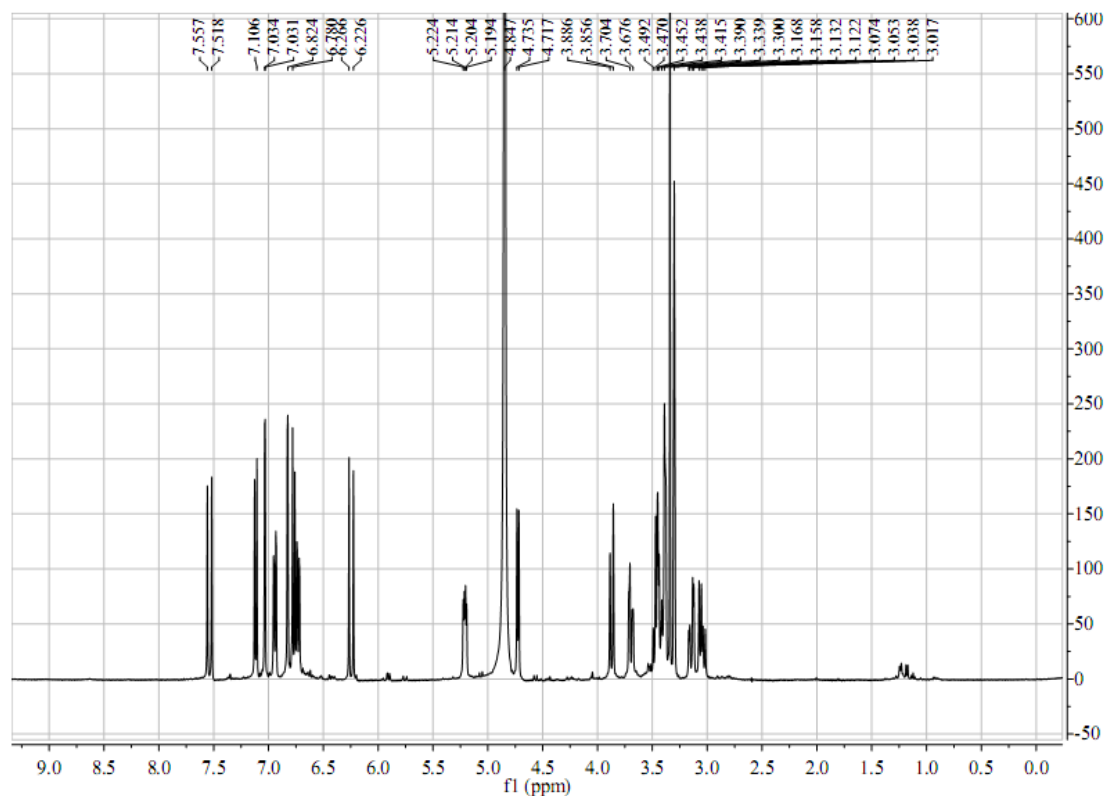

$^{13}\text{C}$ -NMR (125MHz,  $\text{CD}_3\text{OD}$ ) data of rosmarinic acid 4-*O*- $\beta$ -D-glucopyranoside (**11**)

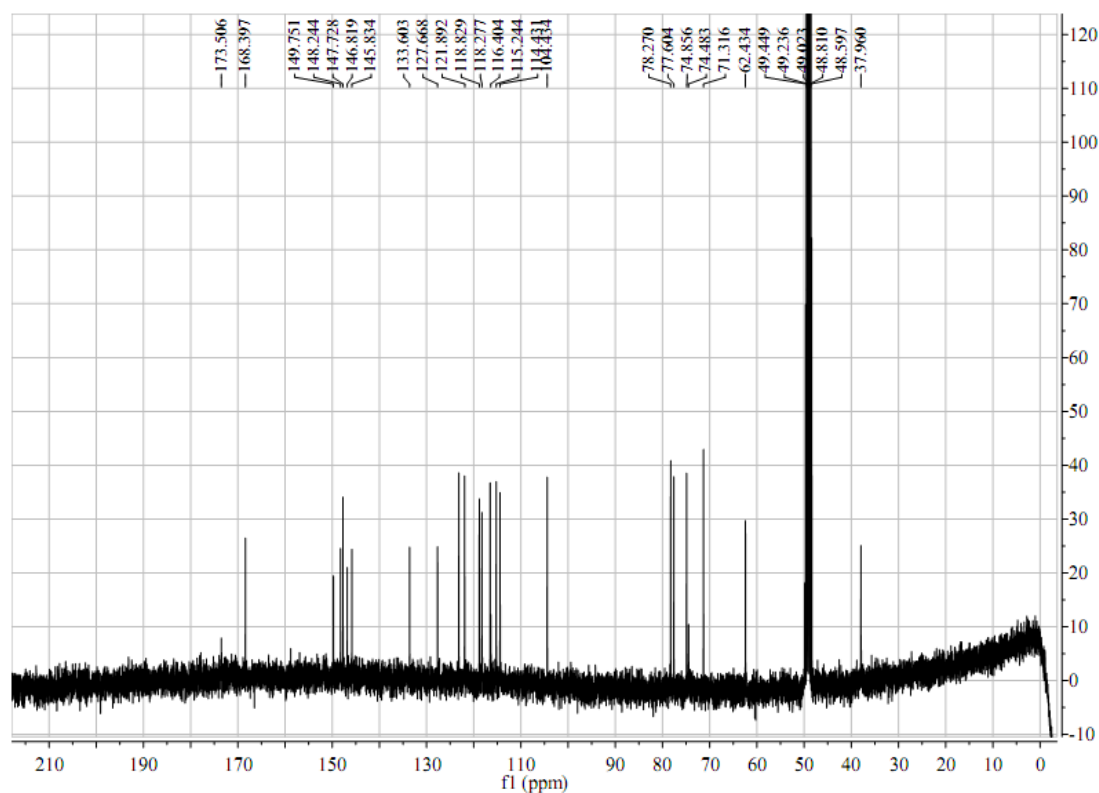

DEPT data of rosmarinic acid 4-*O*- $\beta$ -D-glucopyranoside (**11**)

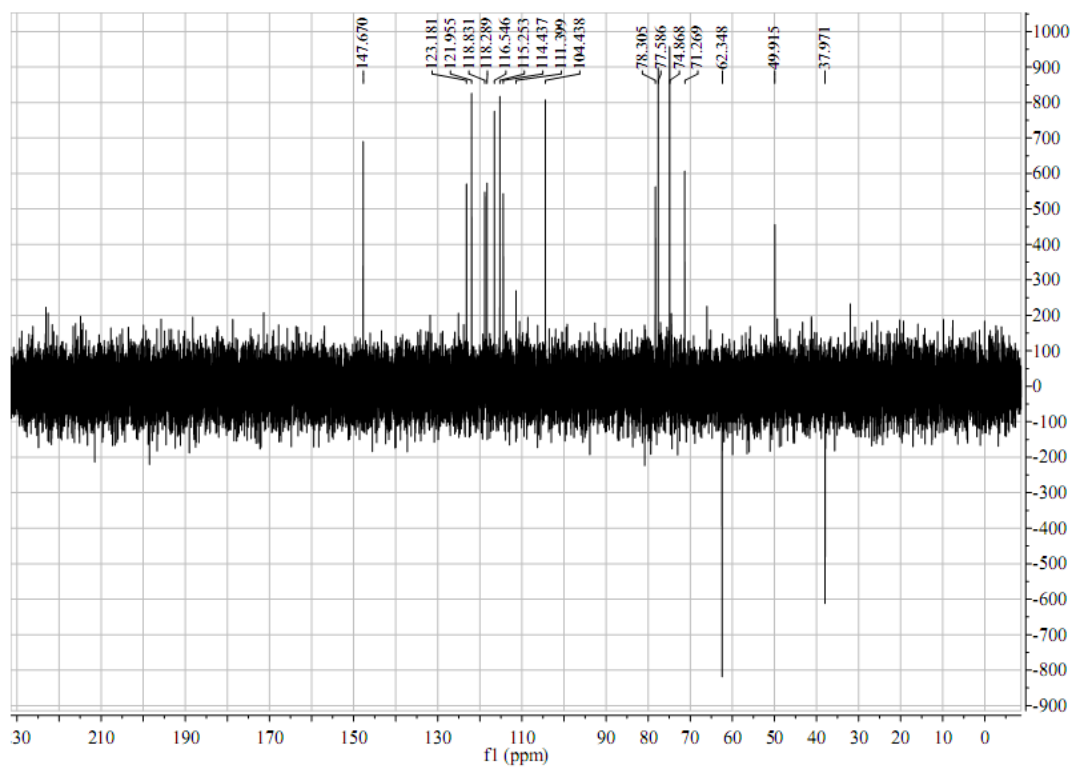

HR-ESI-MS spectrum of rosmarinic acid 4-*O*- $\beta$ -D-glucopyranoside (**11**)

F: FTMS - p ESI Full ms [100.00-1000.00]

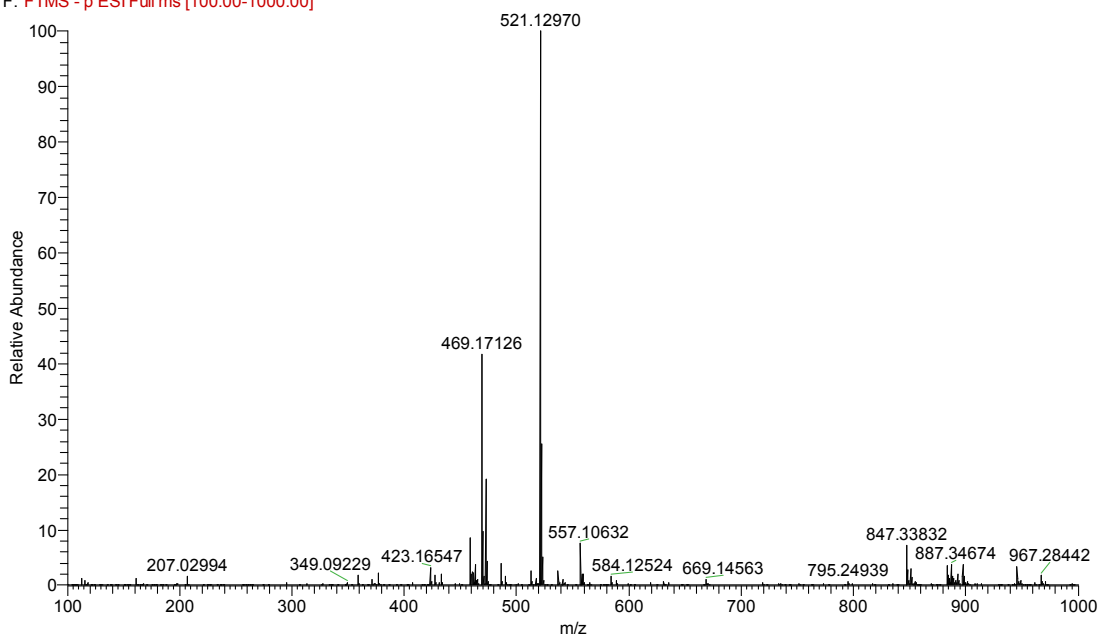

### HR-ESI-MS/MS spectrum of rosmarinic acid 4-*O*-*B*-*D*-glucopyranoside (**11**)

F: FTMS - p ESI d Full ms2 521.13@cid35.00 [130.00-535.00]

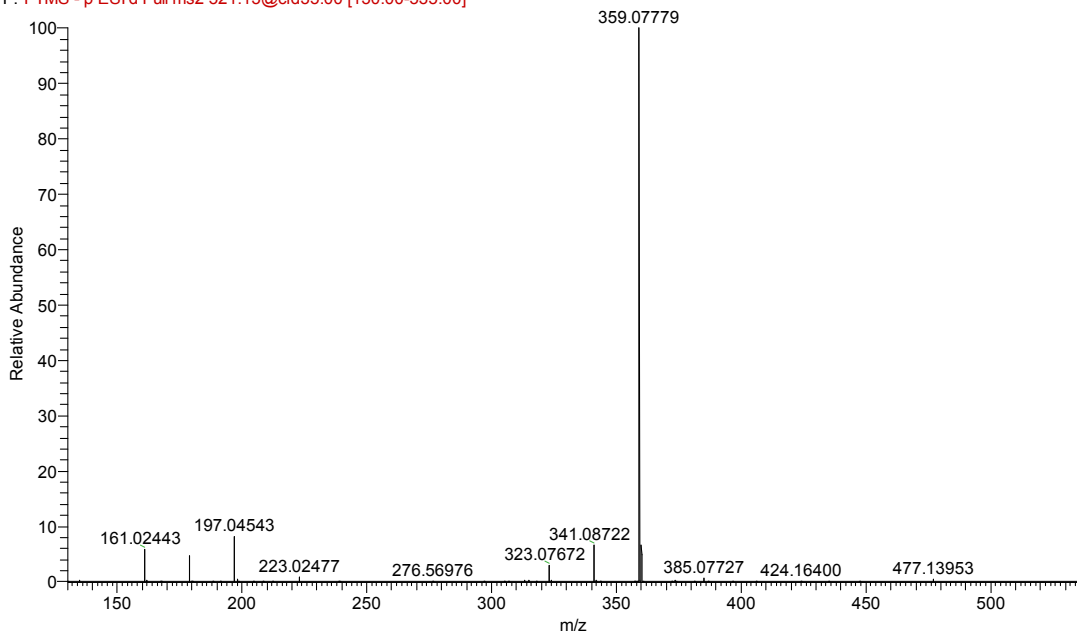

### 1.11 Spectral data of neoisoastilbin (**12**)

<sup>1</sup>H-NMR (500MHz, DMSO-*d*<sub>6</sub>) data of neoisoastilbin (**12**)

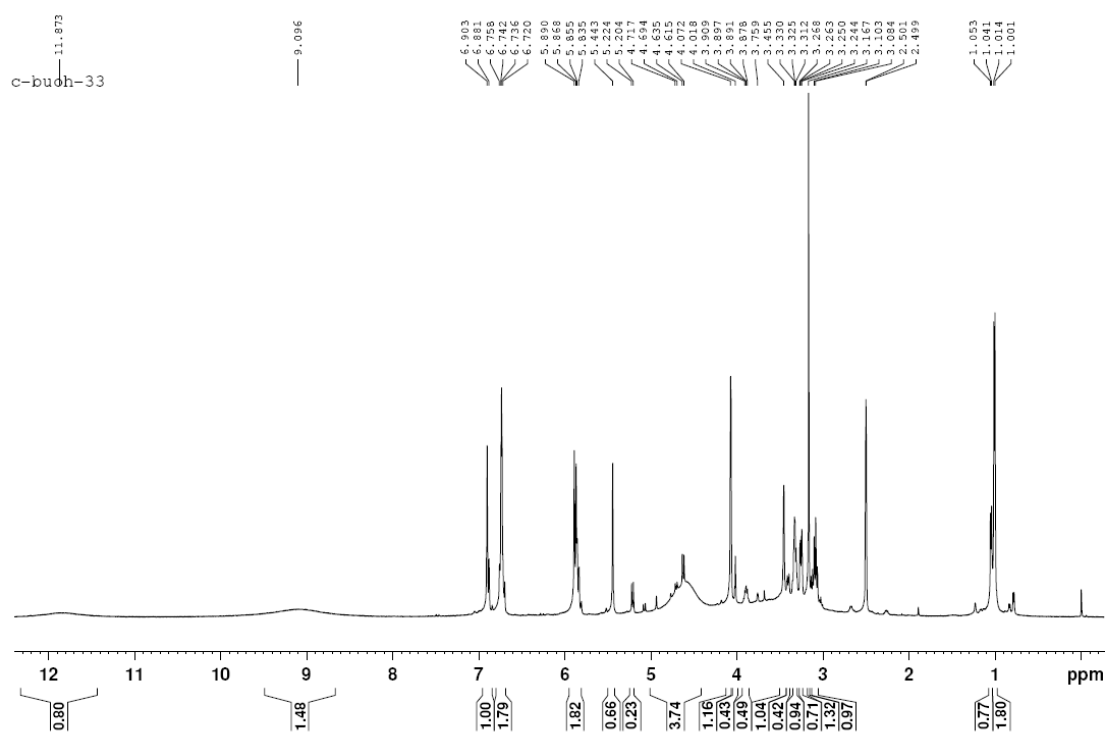

<sup>13</sup>C-NMR (125MHz, DMSO-*d*<sub>6</sub>) data of neoisoastilbin (**12**)

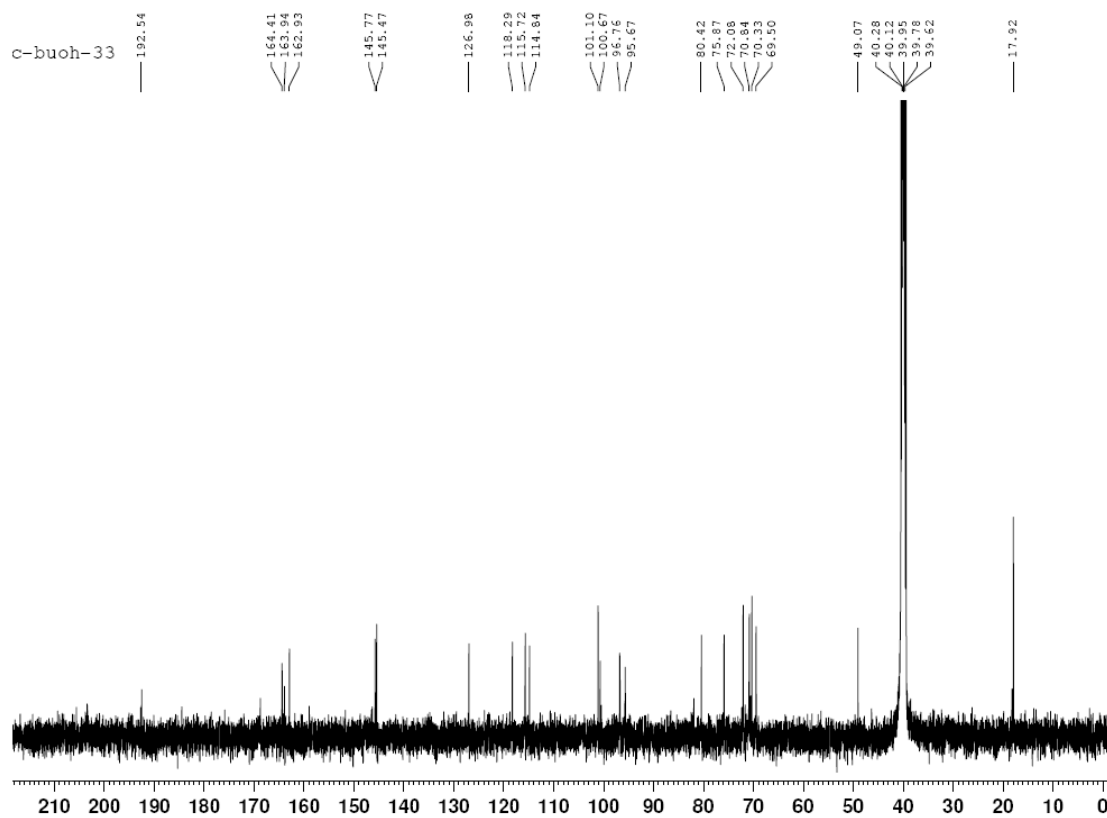

HR-ESI-MS spectrum of neoisoastilbin (**12**)

F: FTMS - p ESI Full ms [100.00-1000.00]

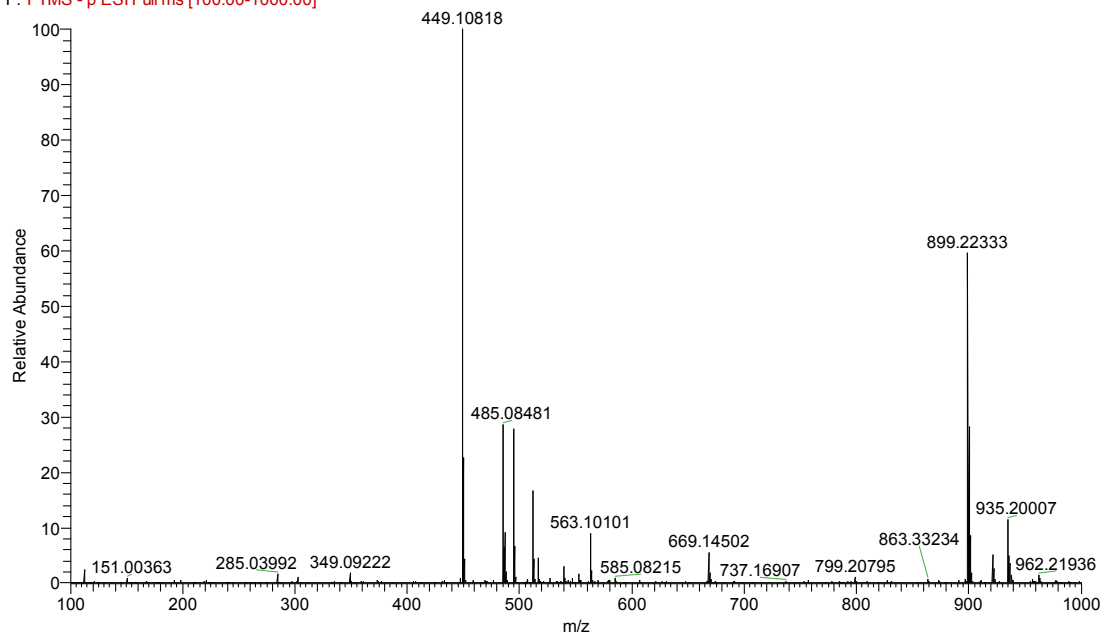

HR-ESI-MS/MS spectrum of neoisoastilbin (12)

F: FTMS - p ESI d Full ms2 449.11@cid35.00 [110.00-460.00]

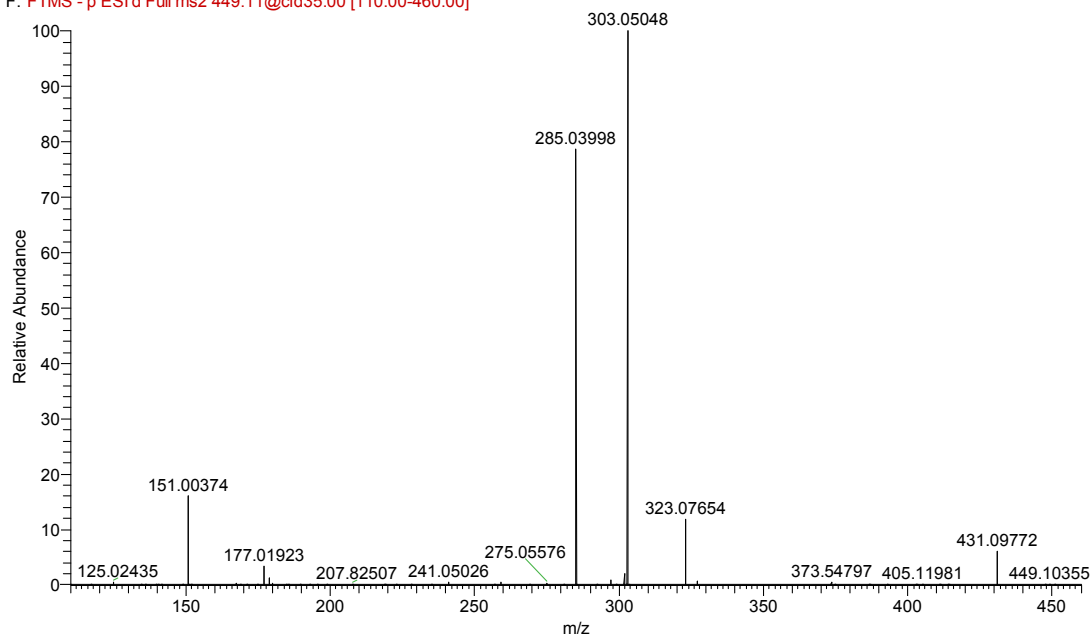

### 1.12 Spectral data of isoastilbin (13)

<sup>1</sup>H-NMR (500MHz, DMSO-d<sub>6</sub>) data of isoastilbin (13)

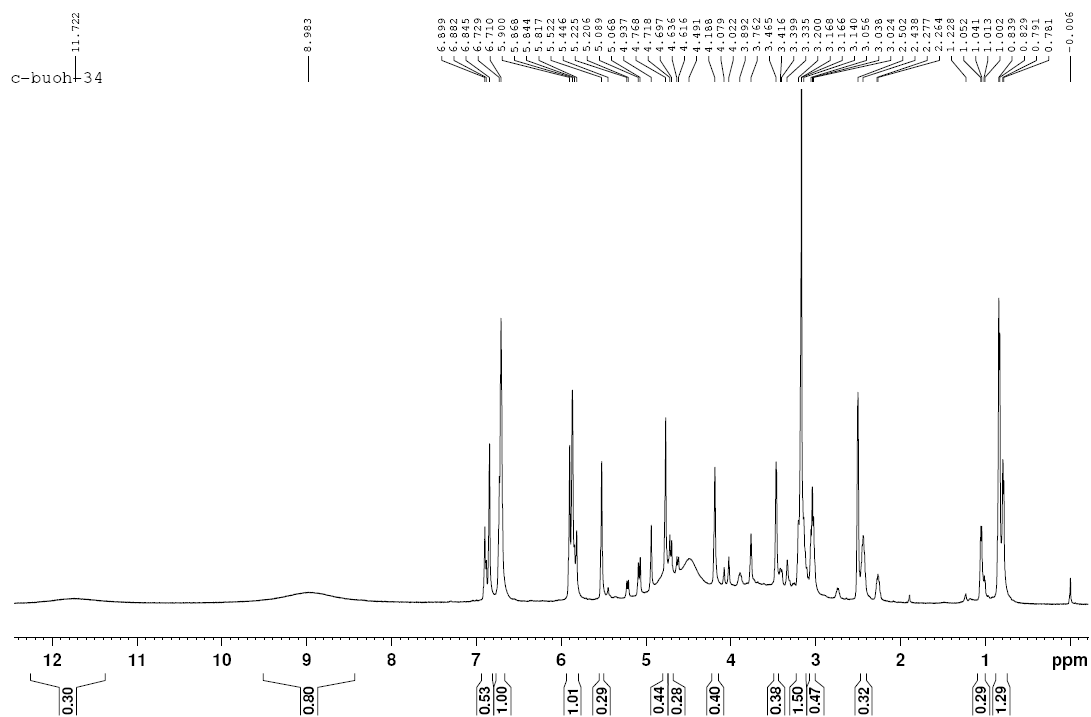

<sup>13</sup>C-NMR (125MHz, DMSO-d<sub>6</sub>) data of isoastilbin (13)

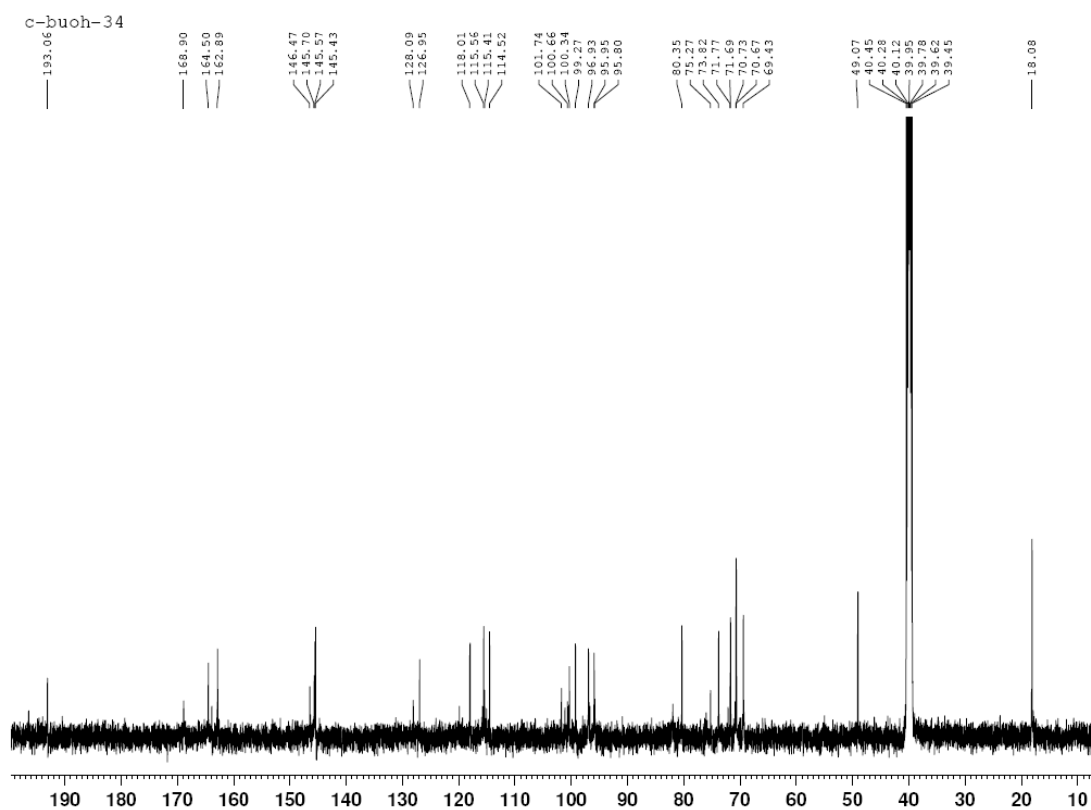

### HR-ESI-MS spectrum of isoastilbin (13)

F: FTMS - p ESI Full ms [100.00-1000.00]

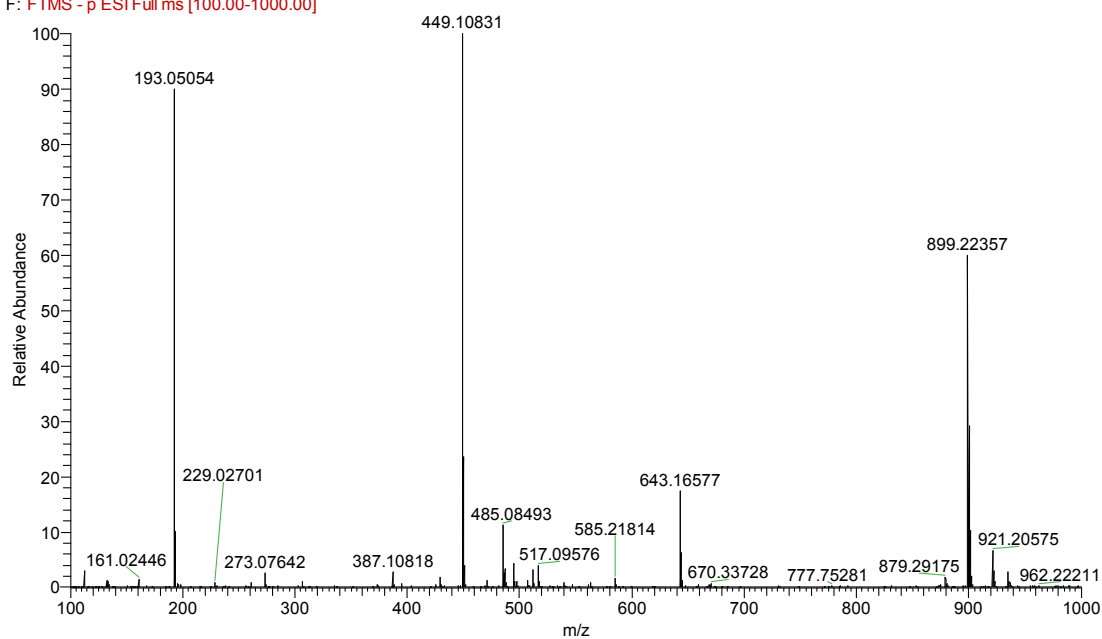

### HR-ESI-MS/MS spectrum of isoastilbin (13)

F: FTMS - p ESI d Full ms2 449.11@cid35.00 [110.00-460.00]

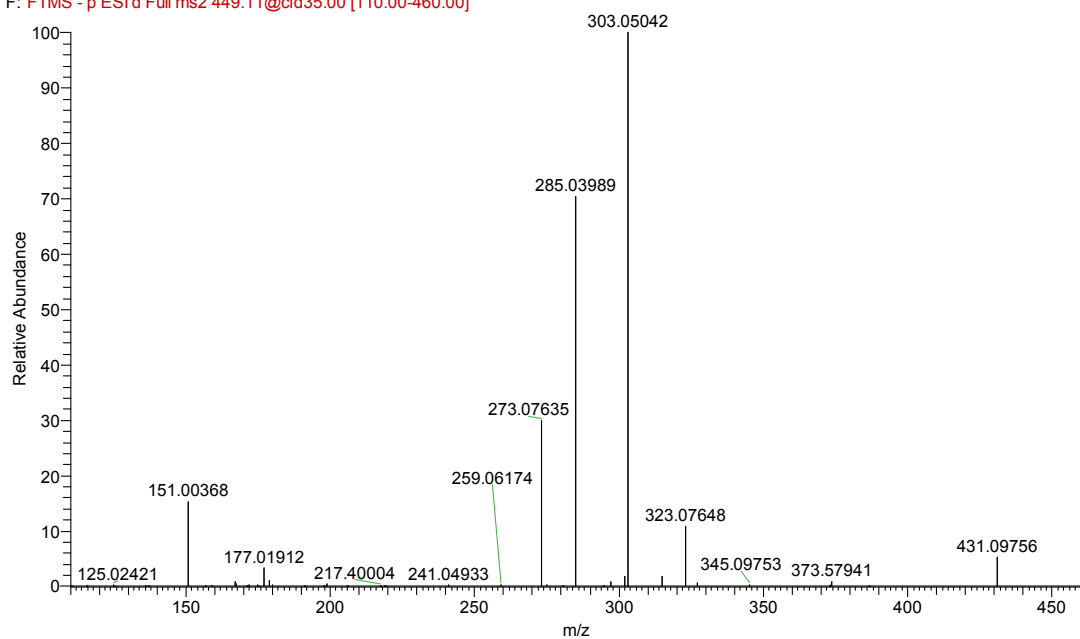

### 1.13 Spectral data of rosmarinic acid (14)

<sup>1</sup>H-NMR (300MHz, DMSO-*d*<sub>6</sub>) data of rosmarinic acid (**14**)

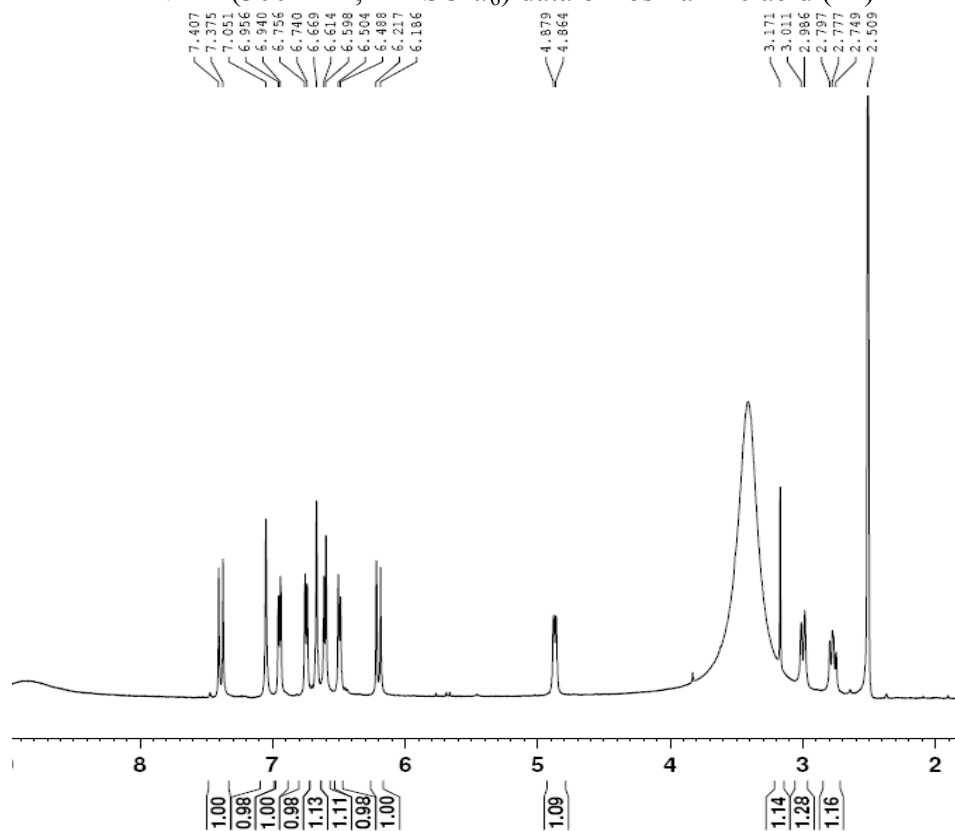

<sup>13</sup>C-NMR (125MHz, DMSO-*d*<sub>6</sub>) data of rosmarinic acid (**14**)

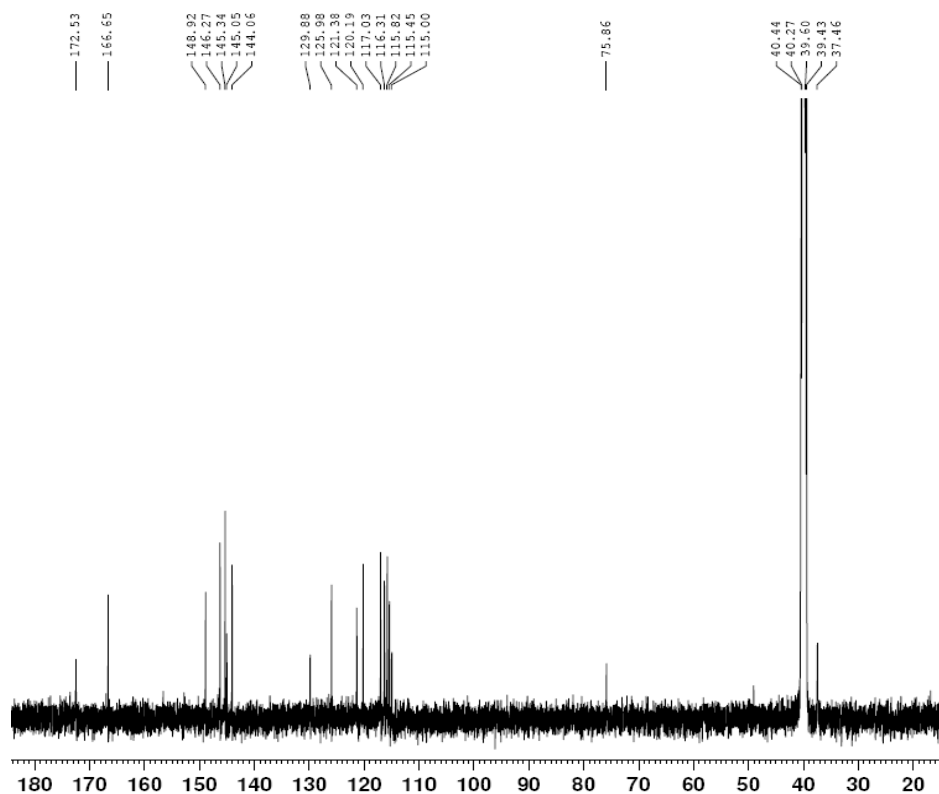

HR-ESI-MS spectrum of rosmarinic acid (**14**)



F: FTMS - p ESI Full ms [100.00-1000.00]

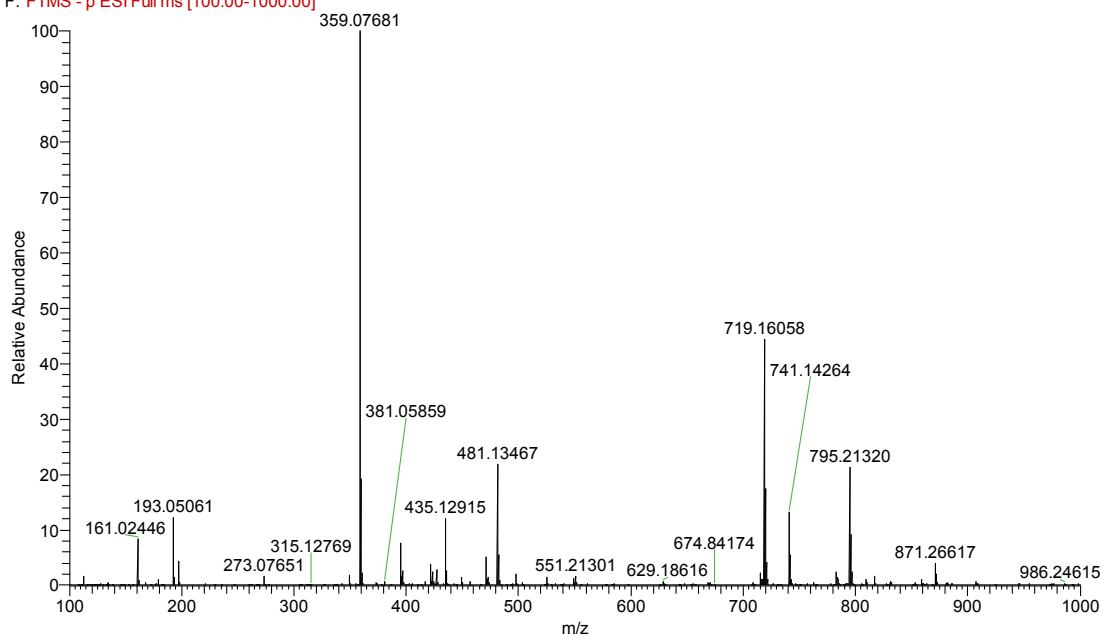

### HR-ESI-MS/MS spectrum of rosmarinic acid (14)

F: FTMS - p ESI d Full ms2 359.08@cid35.00 [85.00-370.00]

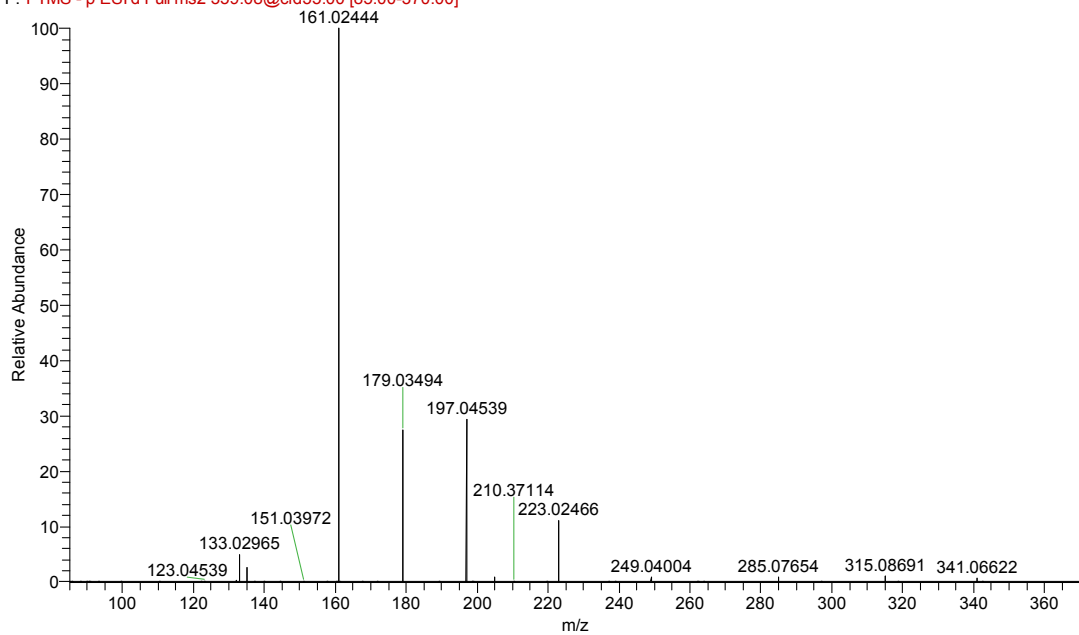

### 1.14 Spectral data of quercetin-3-O- $\beta$ -D-glucuronide (15)

$^1\text{H-NMR}$  (300MHz,  $\text{DMSO-}d_6$ ) data of quercetin-3-*O*- $\beta$ -D-glucuronide (**15**)

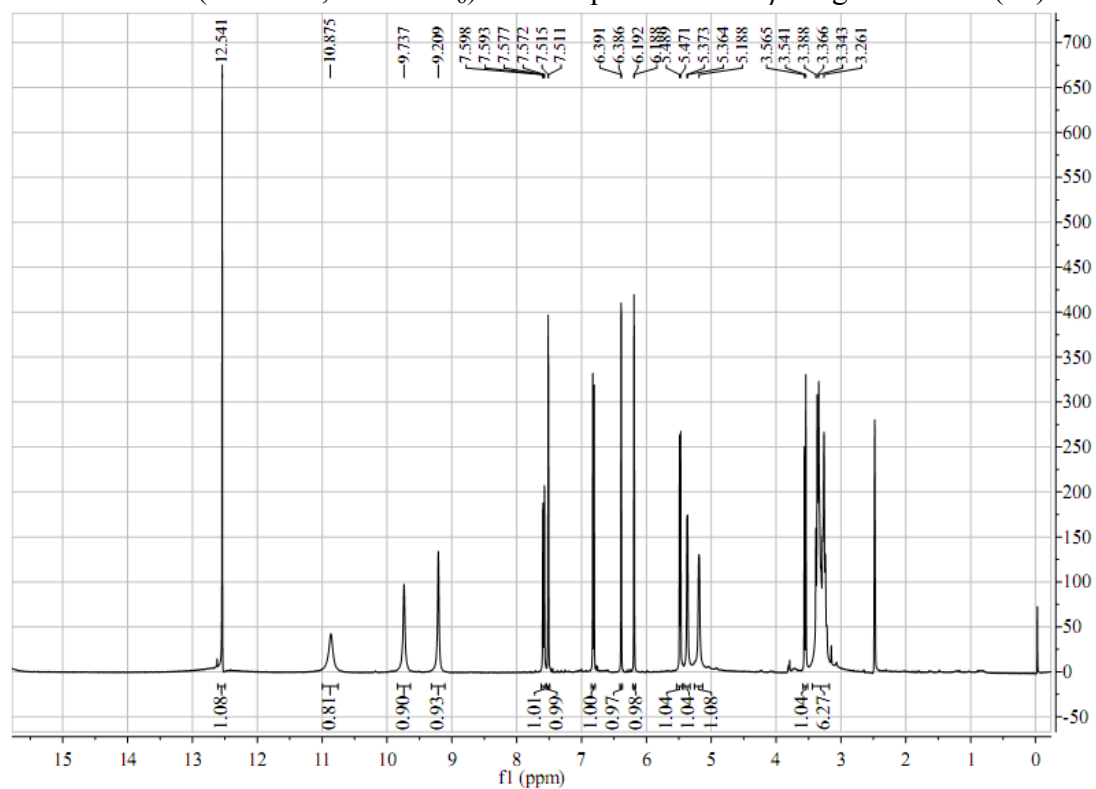

$^{13}\text{C-NMR}$  (125MHz,  $\text{DMSO-}d_6$ ) data of quercetin-3-*O*- $\beta$ -D-glucuronide (**15**)

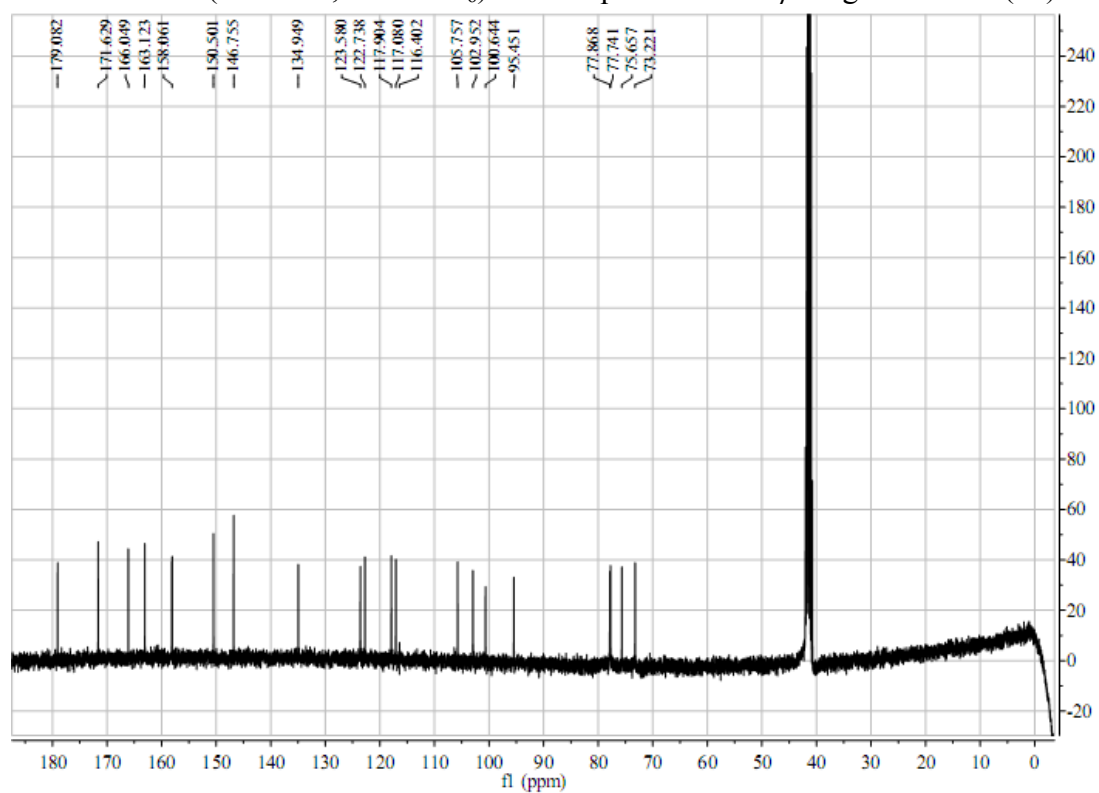

DEPT data of quercetin-3-*O*- $\beta$ -D-glucuronide (**15**)

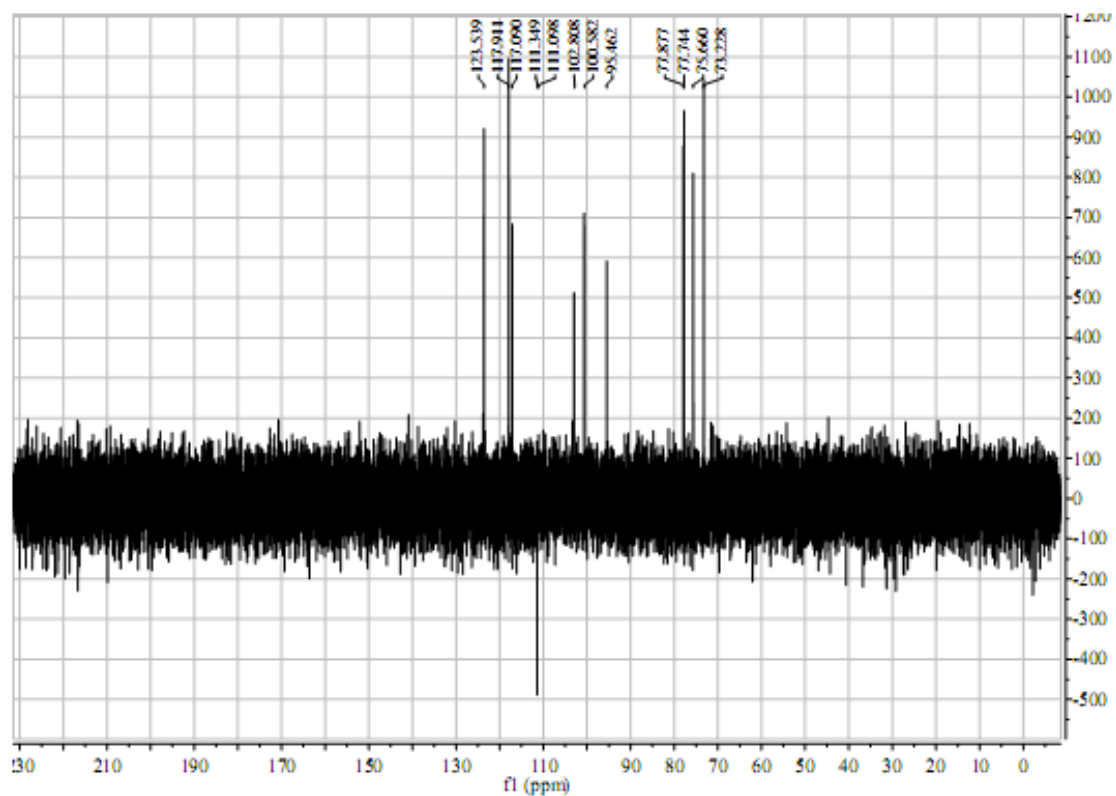

HR-ESI-MS spectrum of quercetin-3-*O*-β-D-glucuronide (15)

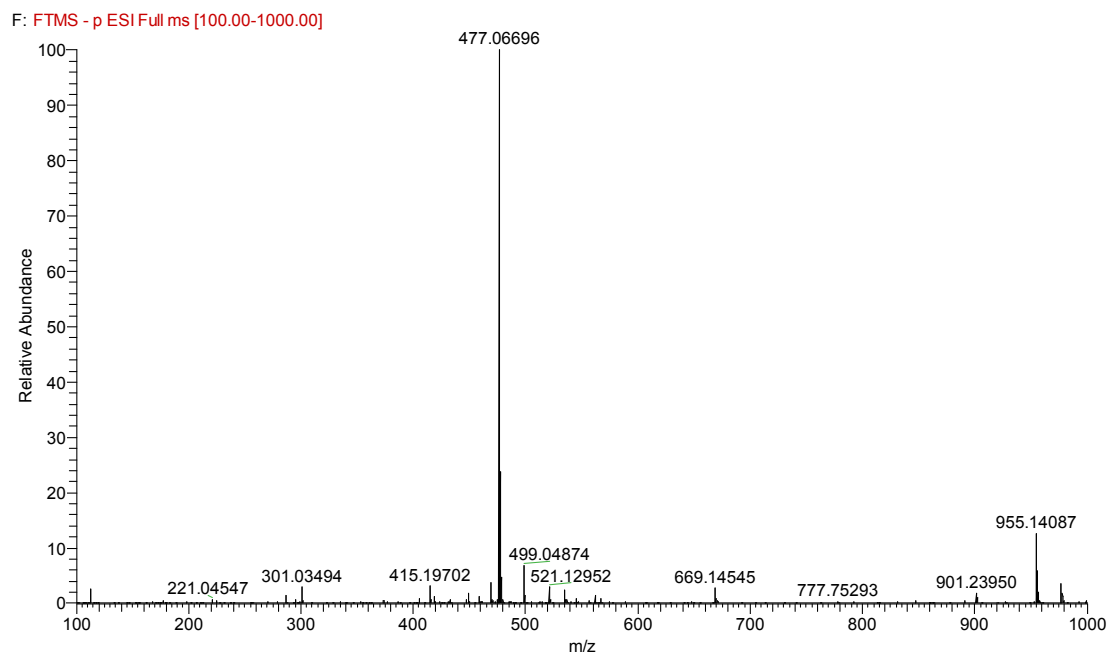

HR-ESI-MS/MS spectrum of quercetin-3-*O*-β-D-glucuronide (15)

F: FTMS - p ESI d Full ms2 477.07@cid35.00 [120.00-490.00]

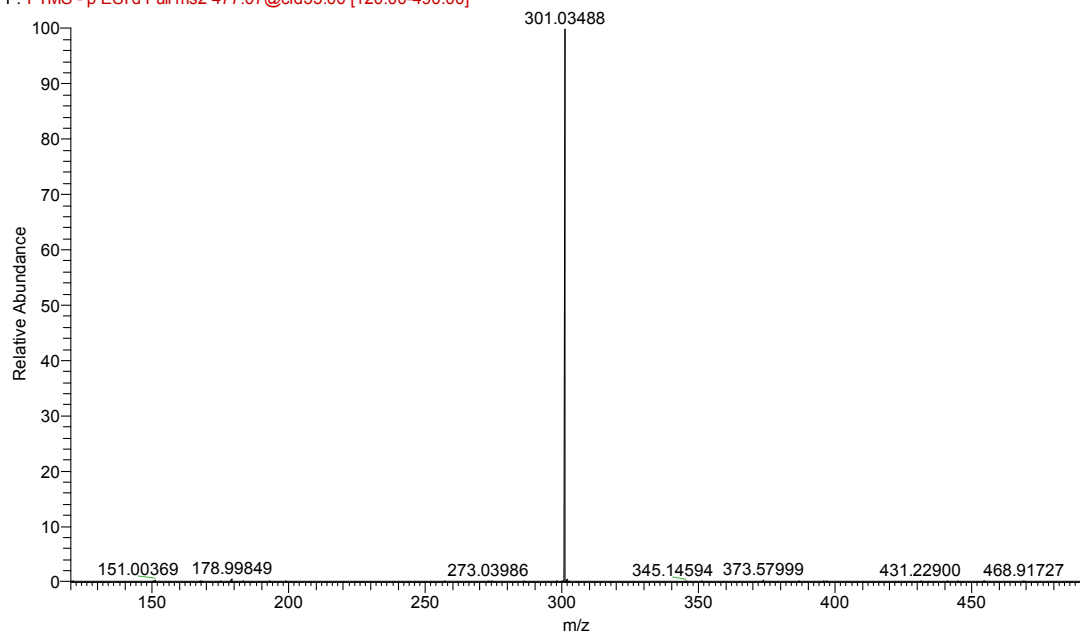

### 1.15 Spectral data of chloranthalactone E (17)

$^1\text{H-NMR}$  (300MHz,  $\text{CDCl}_3$ ) data of chloranthalactone E (17)

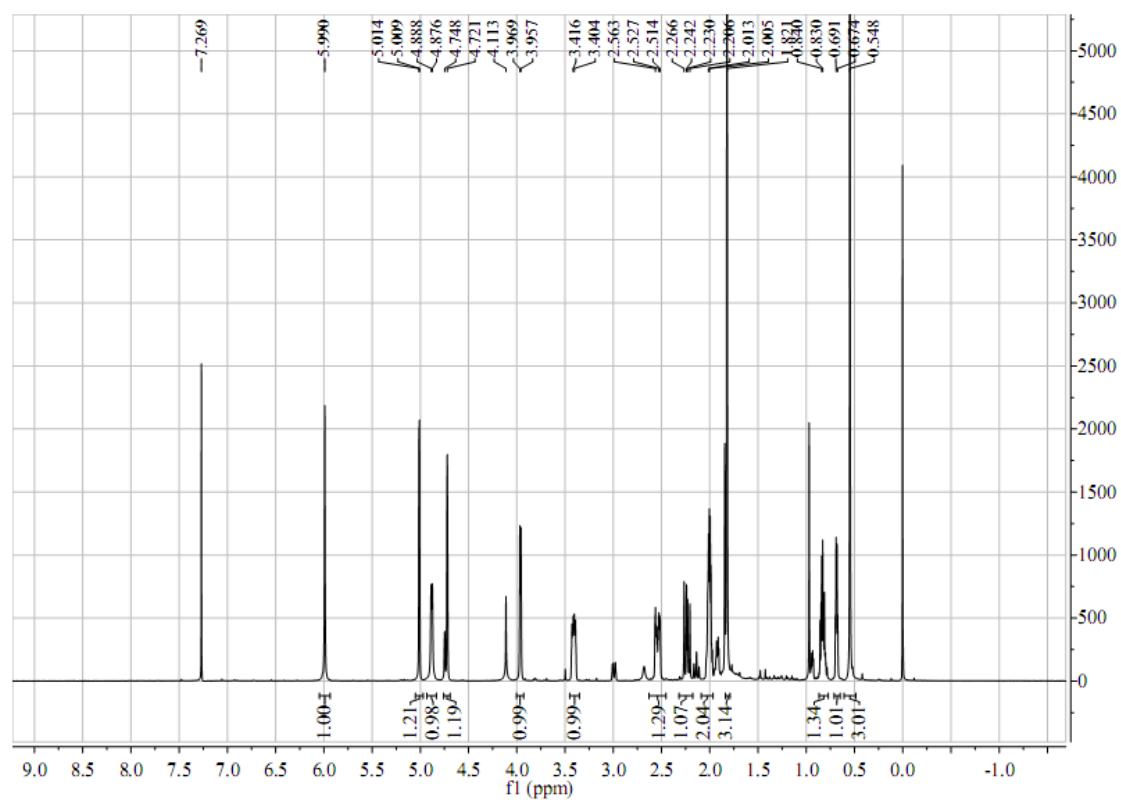

$^{13}\text{C}$ -NMR (125MHz,  $\text{CDCl}_3$ ) data of chloranthalactone E (**17**)

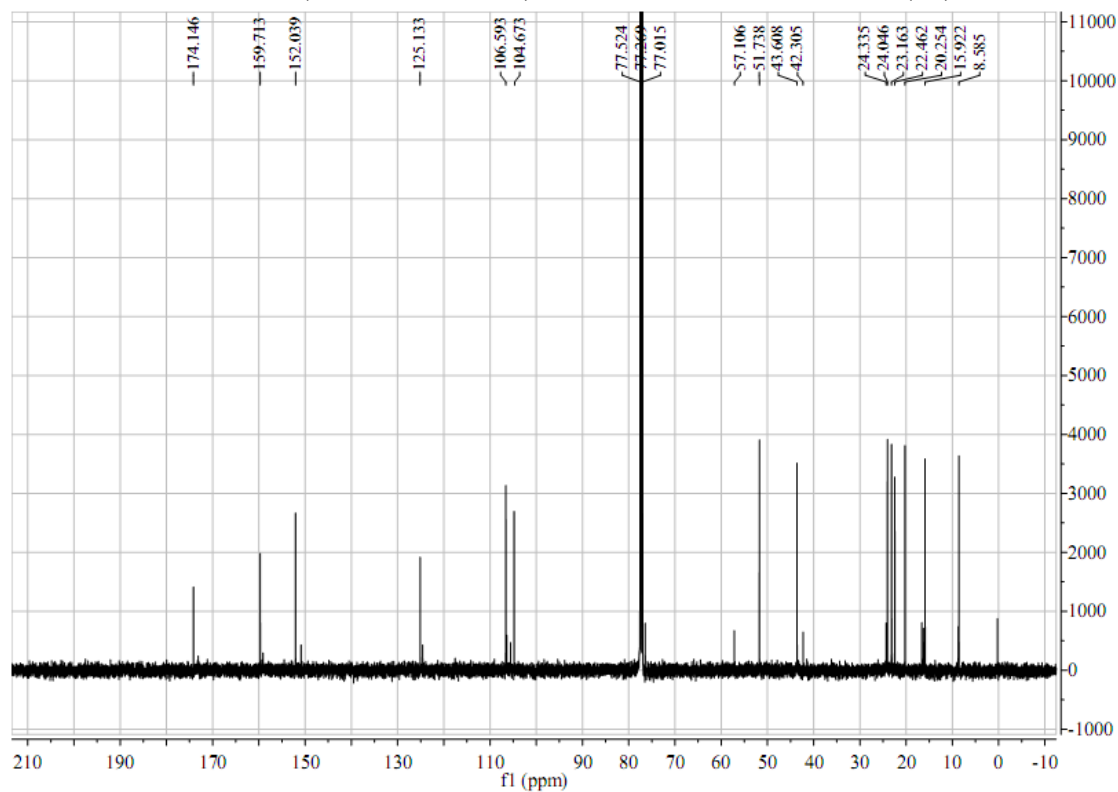

HR-ESI-MS spectrum of chloranthalactone E (**17**)

F: FTMS - p ESI Full ms [100.00-1000.00]

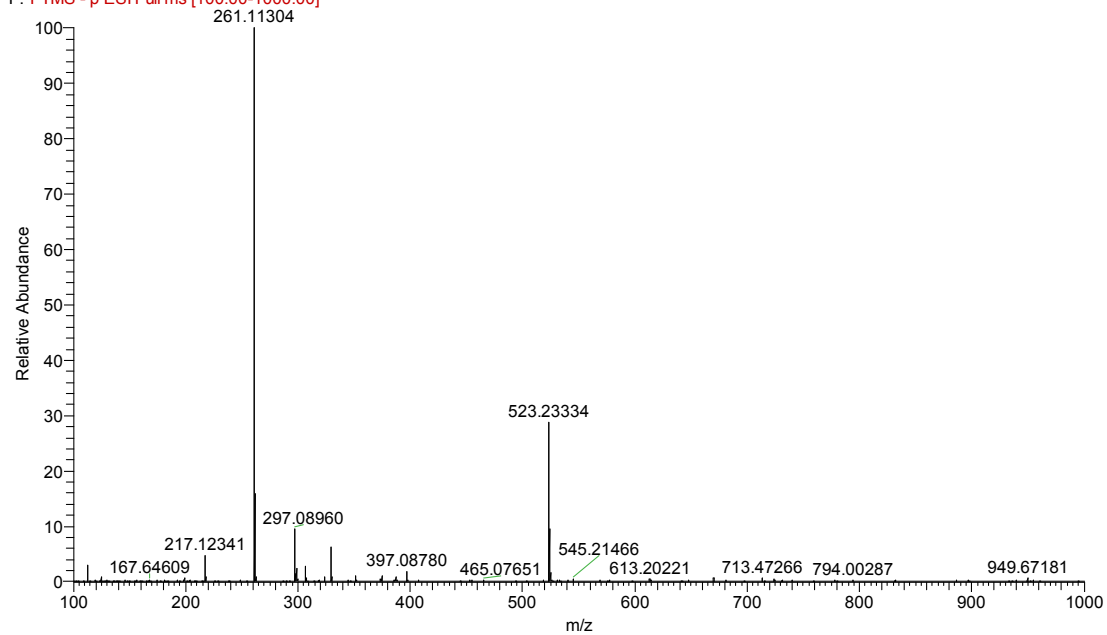

## HR-ESI-MS/MS spectrum of chloranthalactone E (17)

F: FTMS - p ESI d Full ms2 261.11@cid35.00 [60.00-275.00]

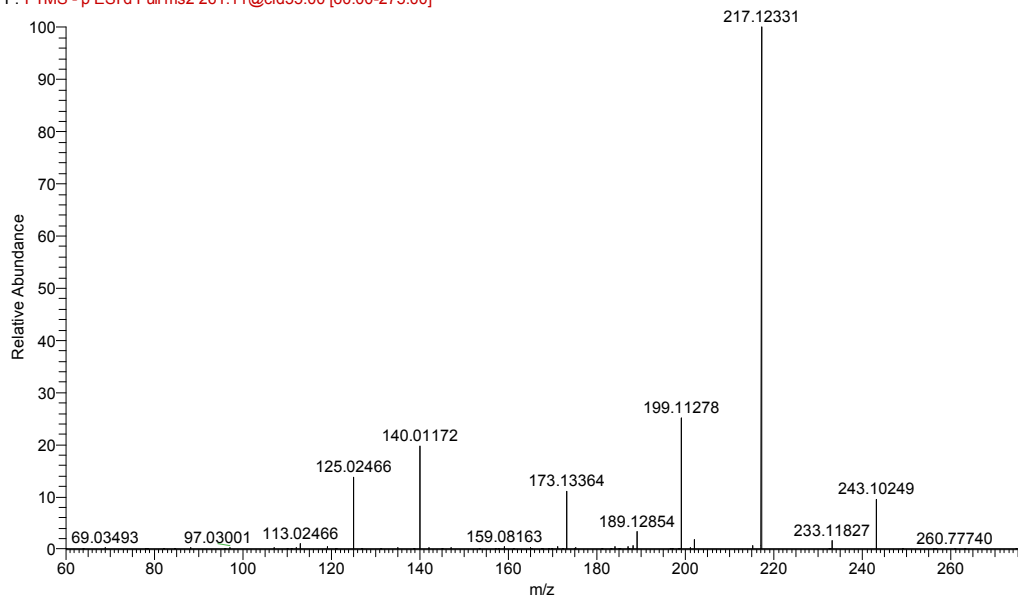

## 2. The column chart of 17 determined constituents from 33 samples

### 2.1 The content of 1 from 33 samples

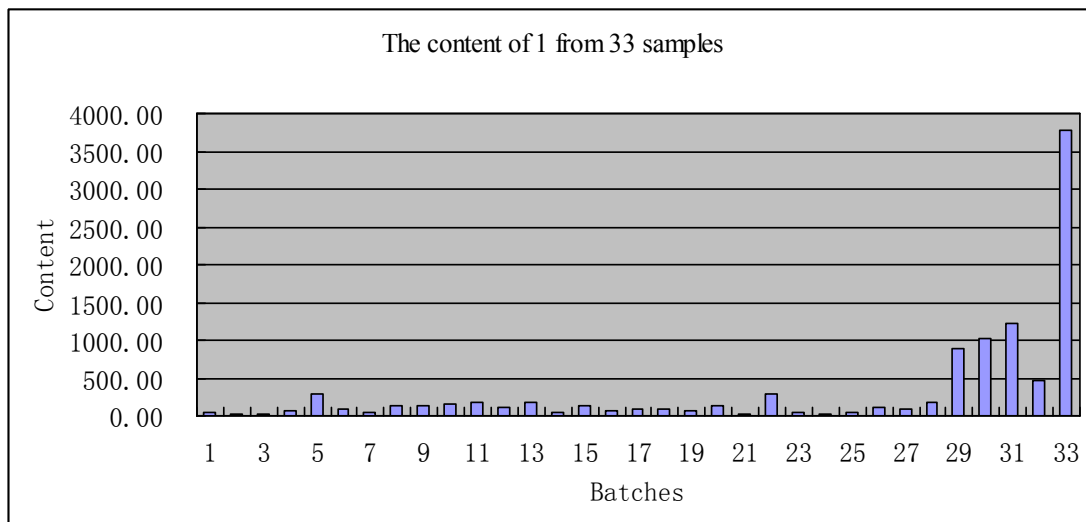

### 2.2 The content of 2 from 33 samples

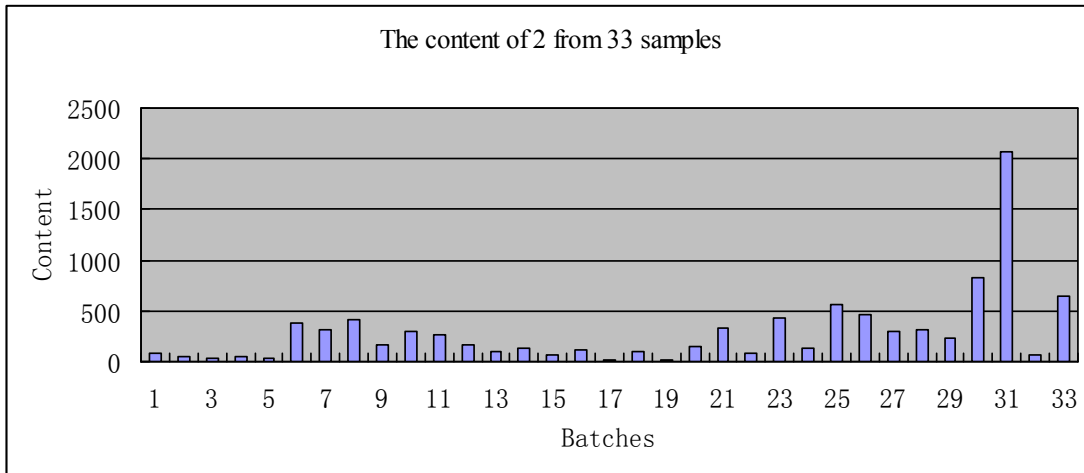

2.3 The content of 3 from 33 samples

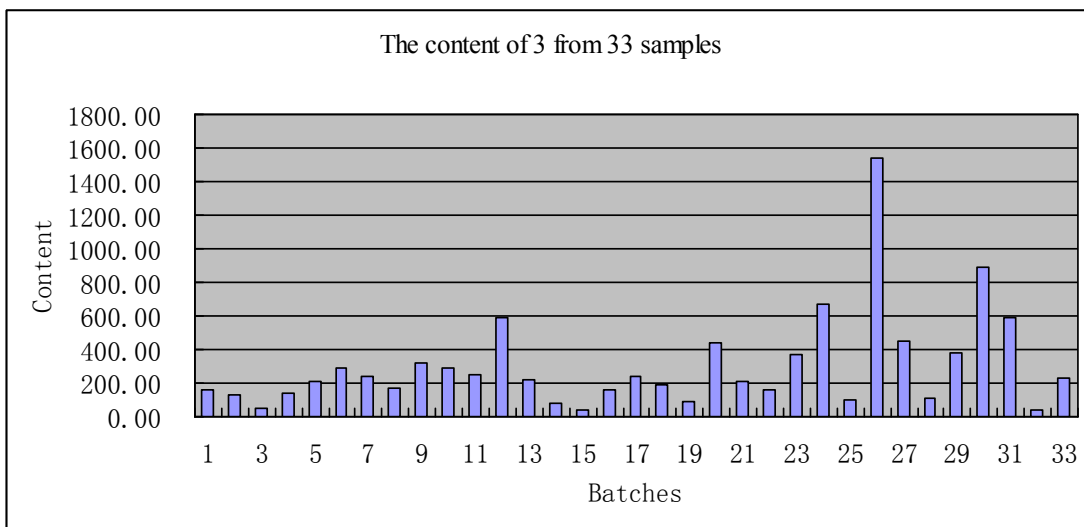

2.4 The content of 4 from 33 samples

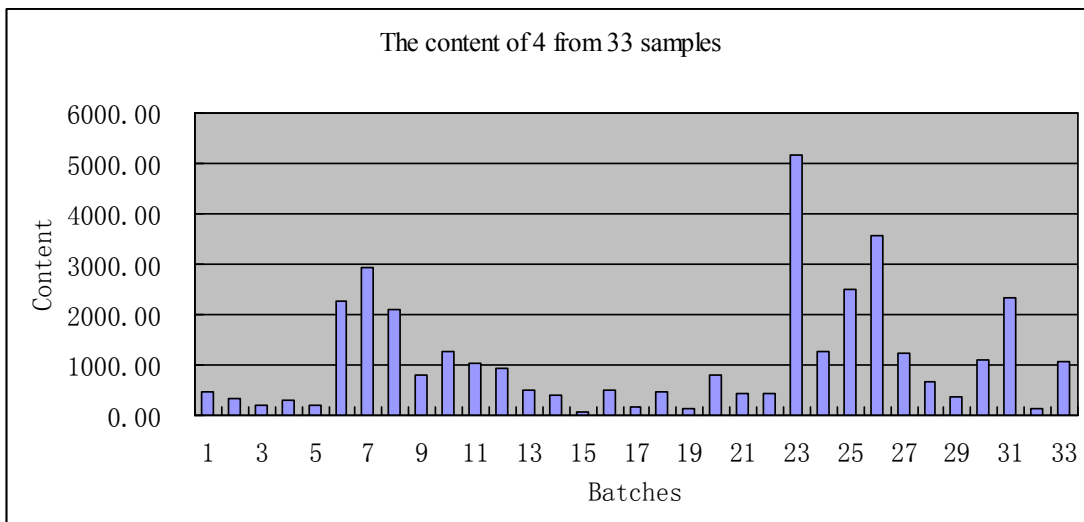

2.5 The content of 5 from 33 samples

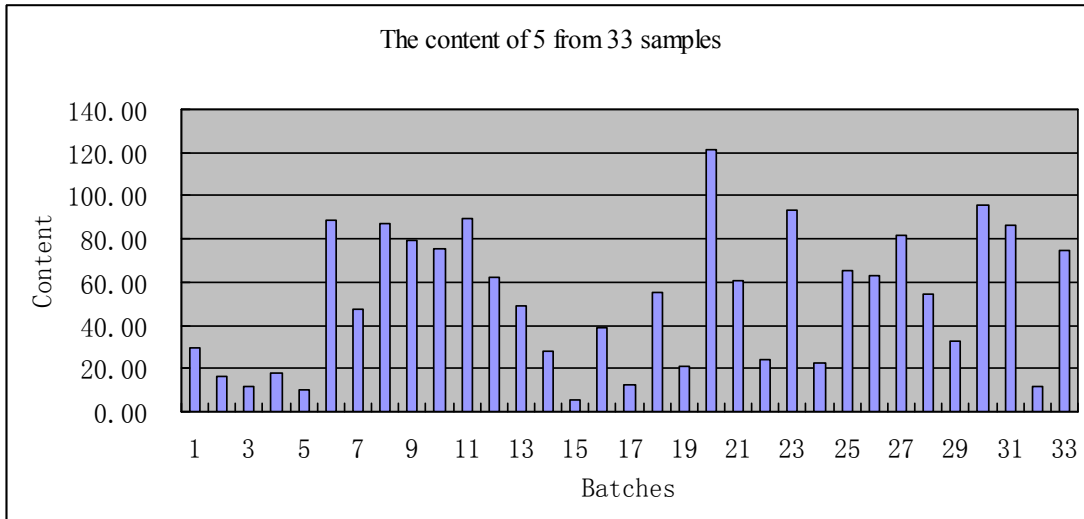

2.6 The content of 6 from 33 samples

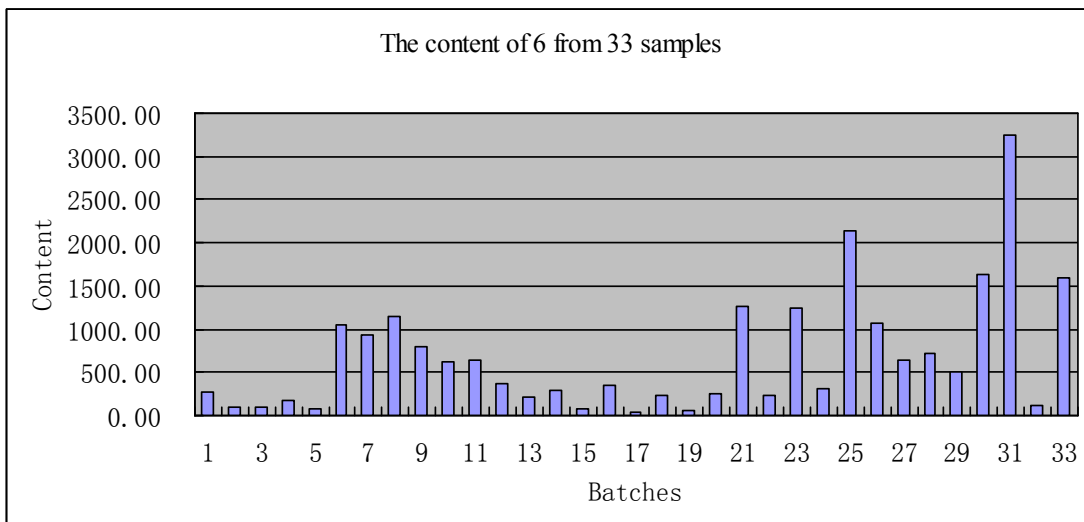

2.7 The content of 7 from 33 samples

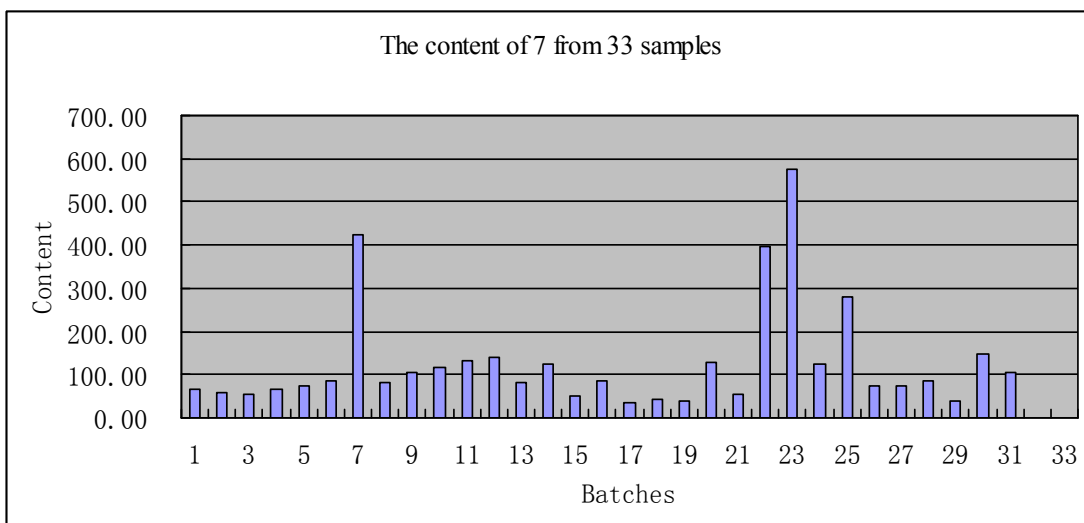



### 2.8 The content of **8** from 33 samples

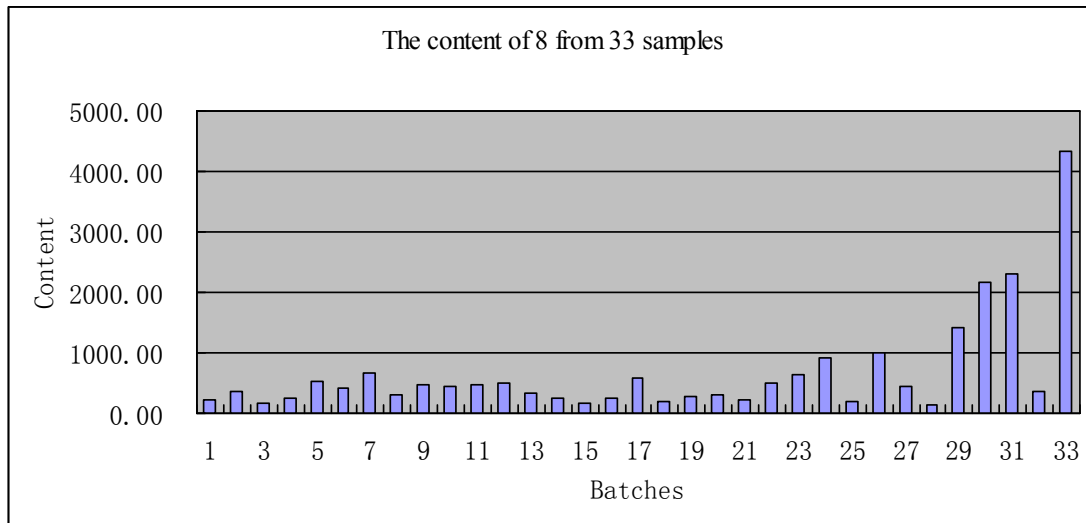

### 2.9 The content of **9** from 33 samples

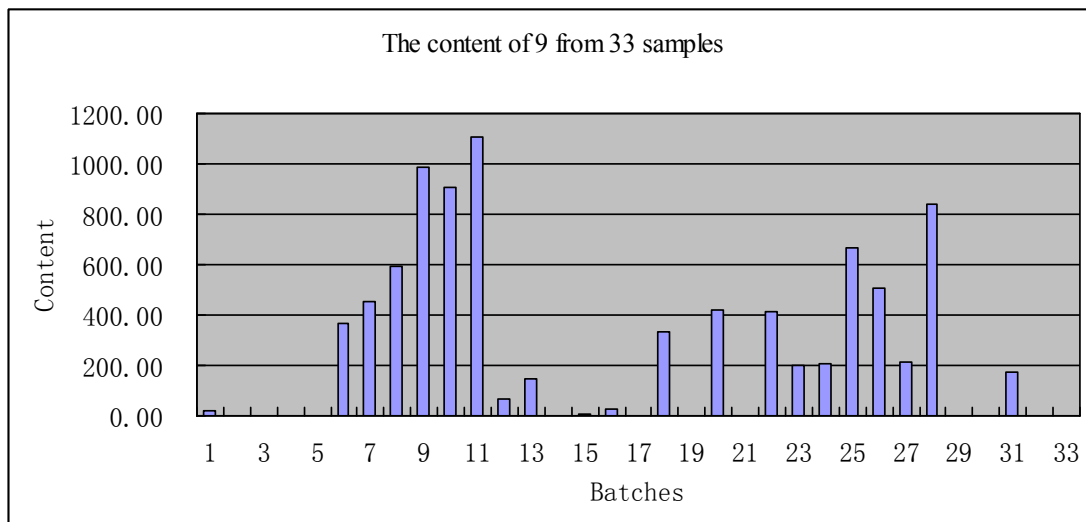

### 2.10 The content of **10** from 33 samples

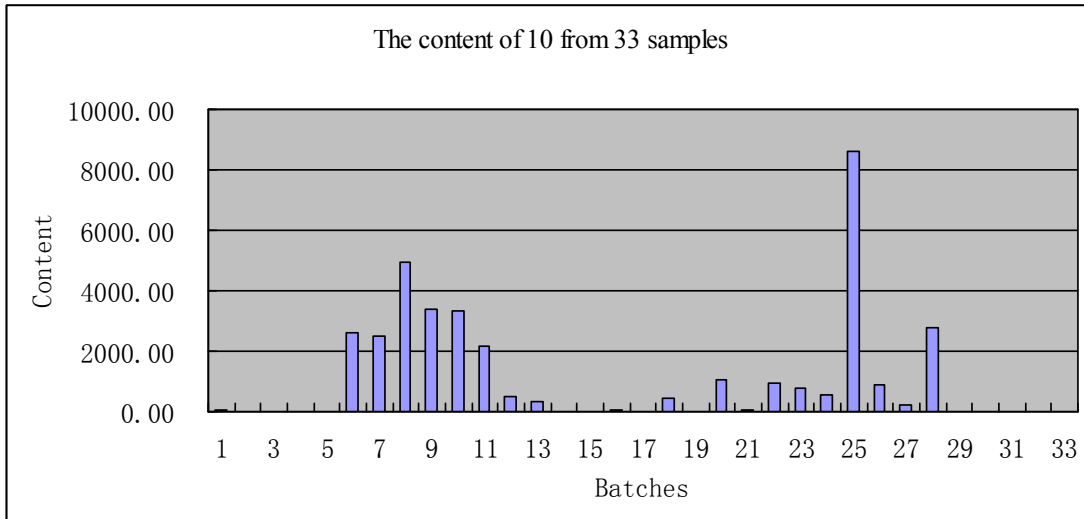

2.11 The content of 11 from 33 samples

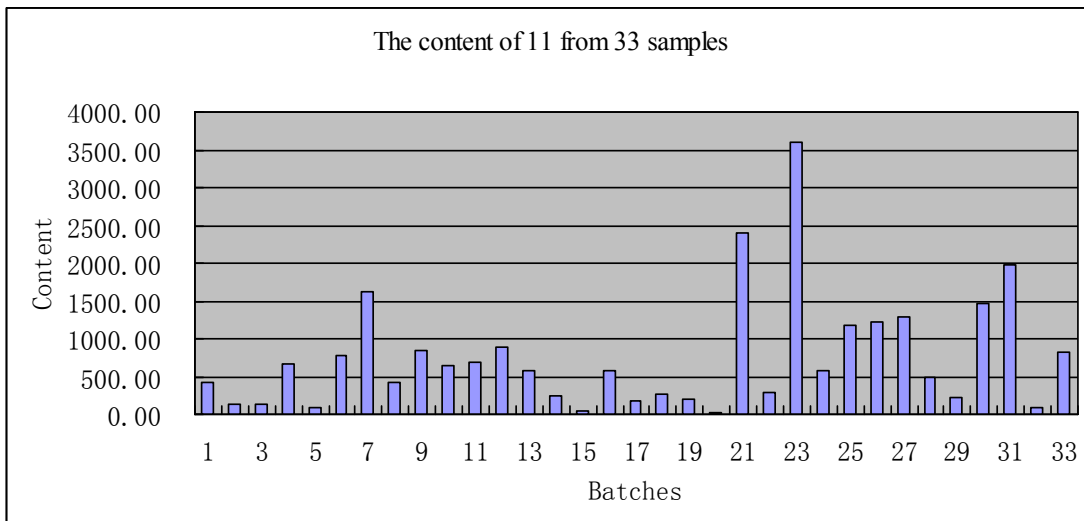

2.12 The content of 12 from 33 samples

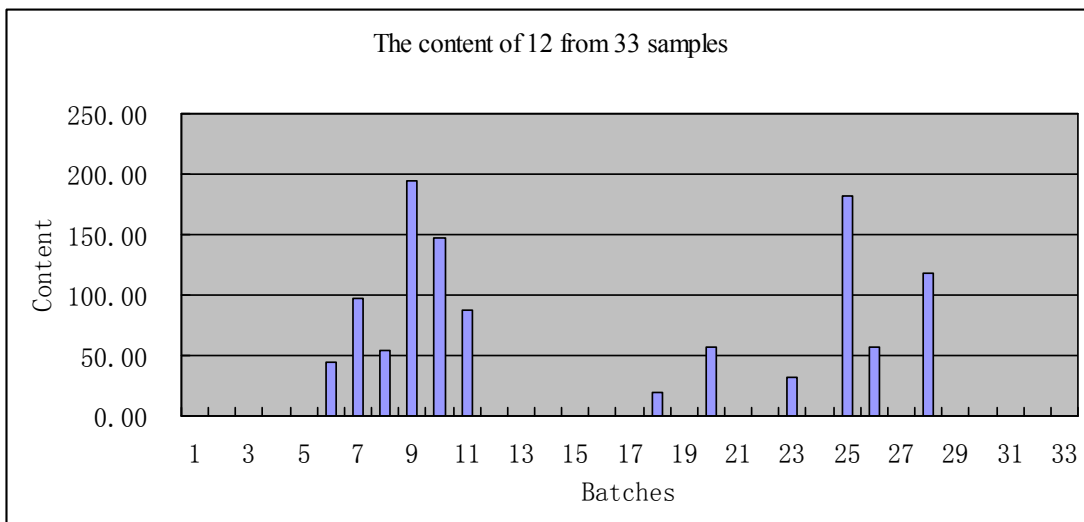

2.13 The content of 13 from 33 samples

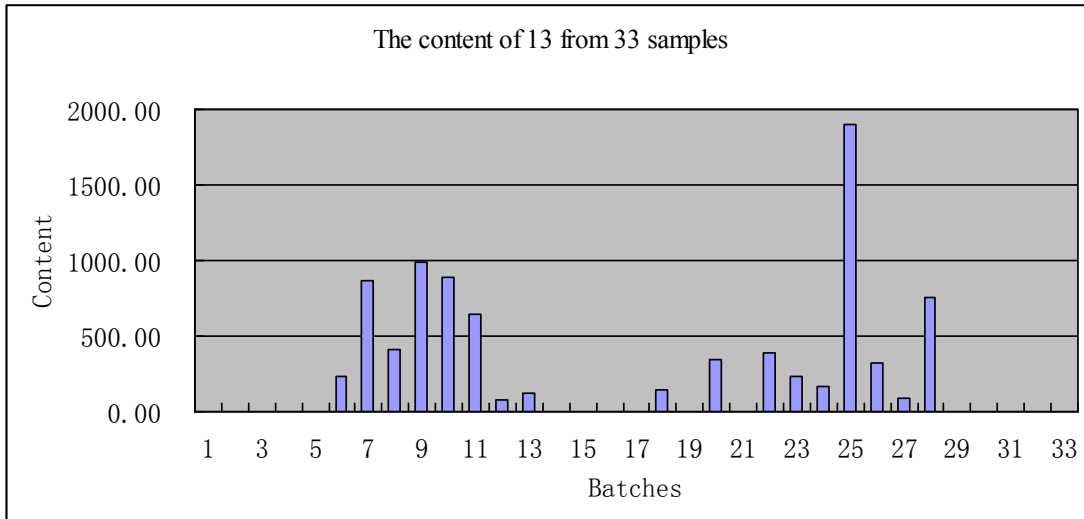

2.14 The content of **14** from 33 samples

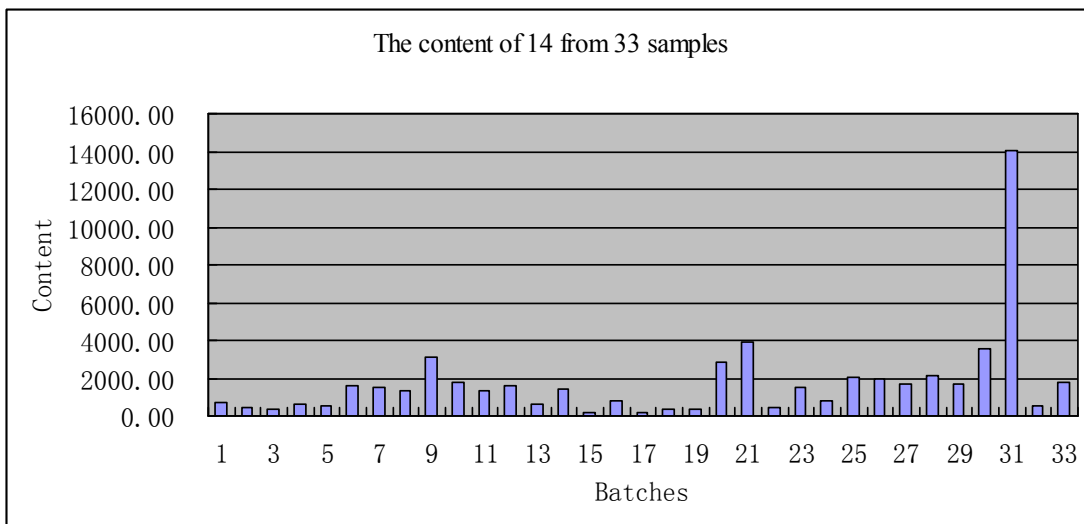

2.15 The content of **15** from 33 samples

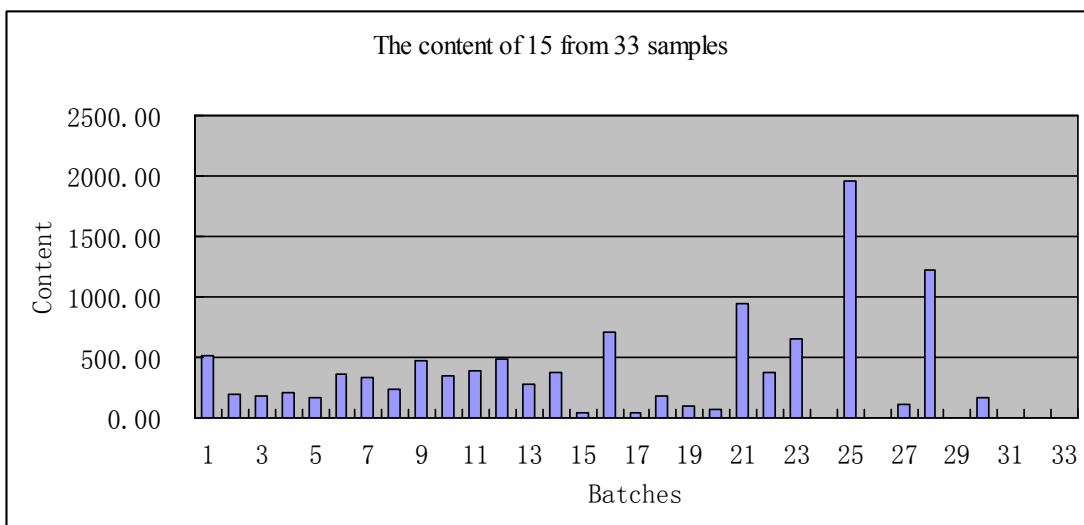

### 2.16 The content of 16 from 33 samples

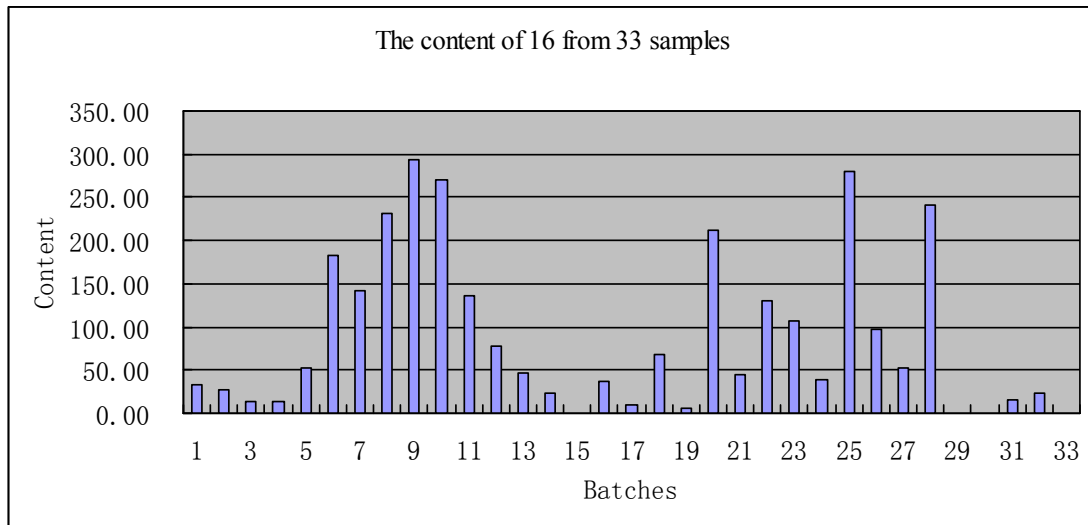

### 2.17 The content of 17 from 33 samples

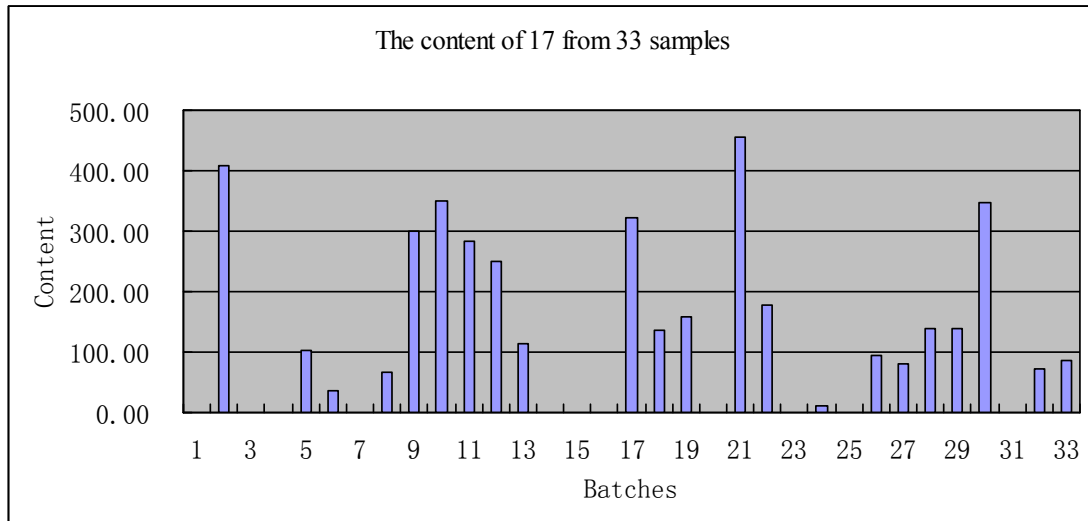

### 2.18 The total content of 1-17 from 33 samples

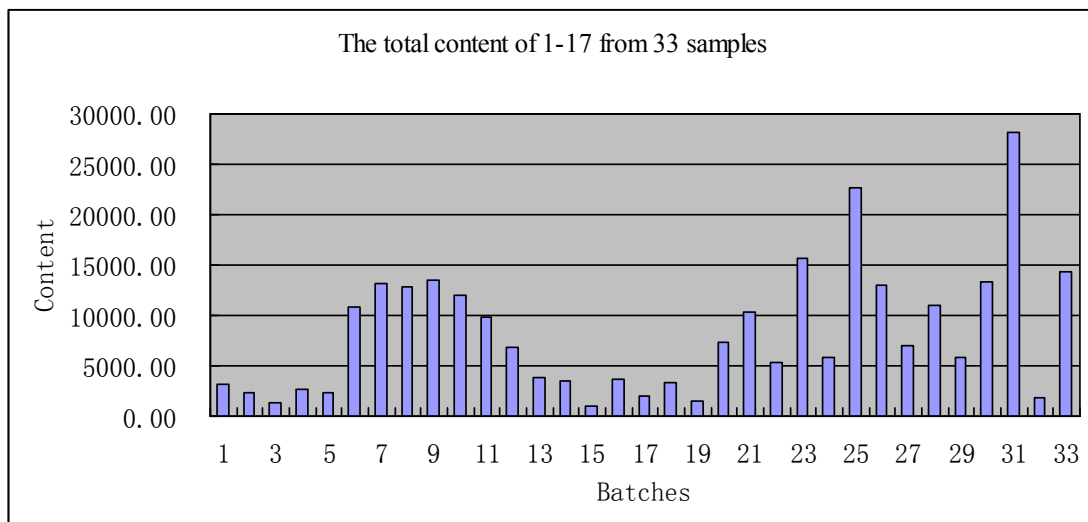

Supplement: c4ay01259c1.pdf [file c4ay01259c1.pdf]
